# Supplementary material for: Ruthenium, copper and ruthenium–copper complexes of an unsymmetrical phosphino pyridyl 1,8-naphthyridine PNNN ligand
Source: Royal Society of Chemistry journal article supplement (doi:10.1039/d4dt02755h), 2024-01-01
Supplement: d4dt02755h1.pdf [file d4dt02755h1.pdf]

## Electronic Supplementary Information

### Ruthenium, copper and ruthenium-copper complexes of an unsymmetrical phosphino pyridyl 1,8-naphthyridine PNNN ligand

Jingyun Wu, Michael A. Stevens, Michael G. Gardiner, Annie L. Colebatch

#### Contents

|    |                                                                                                                                                         |    |
|----|---------------------------------------------------------------------------------------------------------------------------------------------------------|----|
| 1. | Characterisation data for PNNN .....                                                                                                                    | 2  |
| 2. | Characterisation data for $[\text{Cu}_2\text{Cl}_2(\text{PNNN})]$ ( <b>1</b> ) .....                                                                    | 6  |
| 3. | Characterisation data for $[\text{RuCl}(\text{cymene})(\text{PNNN})]\text{Cl}$ ( <b>[2]Cl</b> ) .....                                                   | 10 |
| 4. | Characterisation data for $[\text{RuCl}(\text{cymene})(\text{PNNN})]\text{PF}_6$ ( <b>[2]PF<sub>6</sub></b> ) .....                                     | 14 |
| 5. | Characterisation data for $[\text{RuCuCl}_3(\text{cymene})(\text{PNNN})]$ ( <b>3</b> ) .....                                                            | 17 |
| 6. | Characterisation data for $[\text{RuCuCl}_2(\text{cymene})(\text{PNNN})]_2[\text{PF}_6]_2$ ( <b>[4]<sub>2</sub>[PF<sub>6</sub>]<sub>2</sub></b> ) ..... | 21 |
| 7. | Characterisation data for $[\text{Cu}_2(\text{O}^t\text{Bu})(\text{PNNN}^*)]$ ( <b>5</b> ) .....                                                        | 25 |
| 8. | Characterisation data for $[\text{RuCuCl}(\text{cymene})(\text{PNNN}^*)]\text{PF}_6$ ( <b>[6]PF<sub>6</sub></b> ) .....                                 | 28 |
| 9. | X-ray crystallographic data .....                                                                                                                       | 32 |

# 1. Characterisation data for PNNN

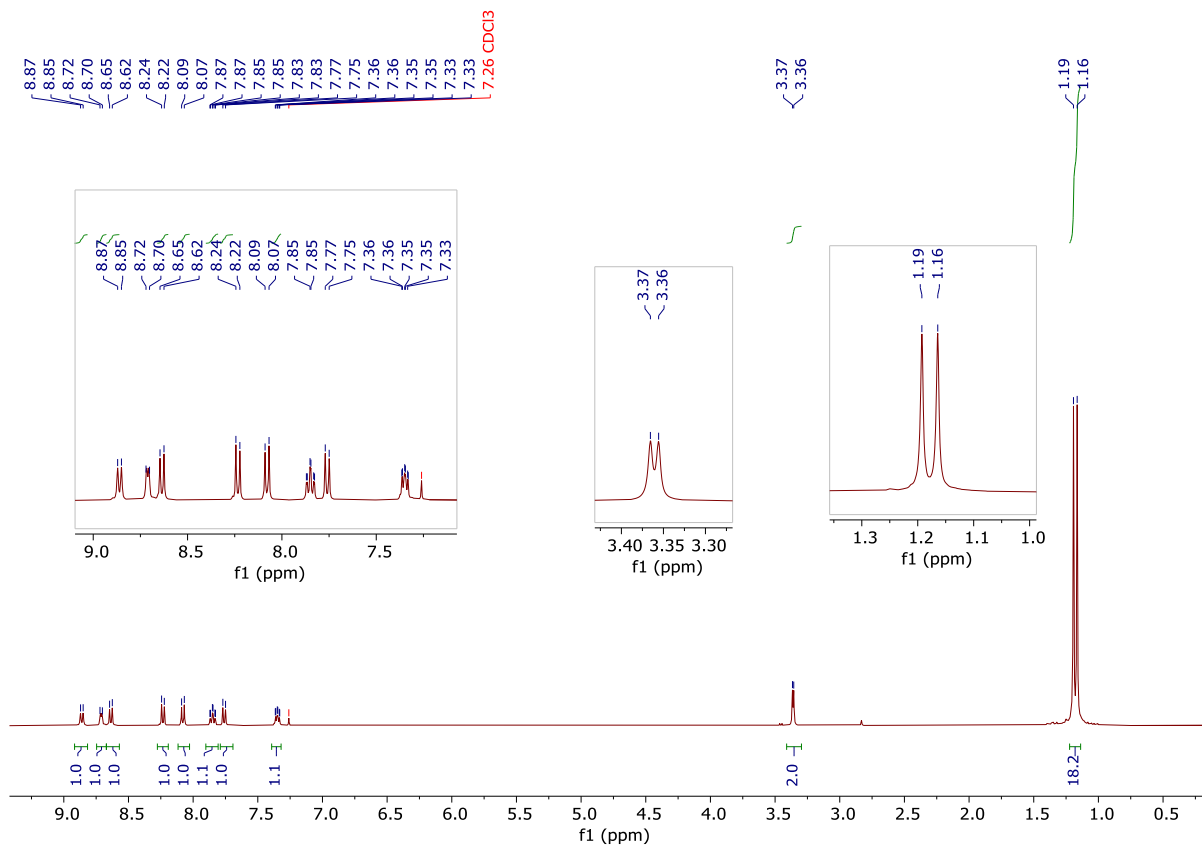

Figure S1. <sup>1</sup>H NMR spectrum of PNNN (400 MHz, CDCl<sub>3</sub>, 298 K).

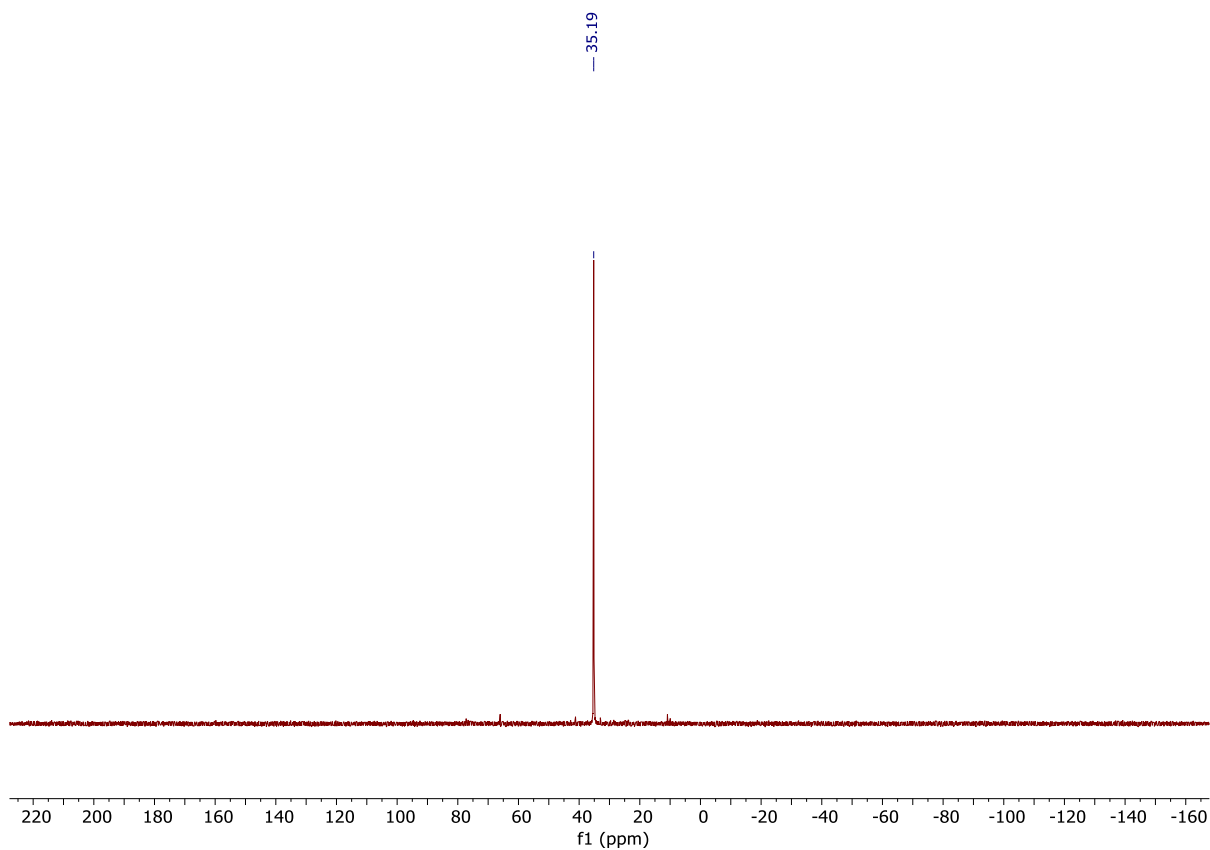

Figure S2. <sup>31</sup>P{<sup>1</sup>H} NMR spectrum of PNNN (162 MHz, CDCl<sub>3</sub>, 298 K).

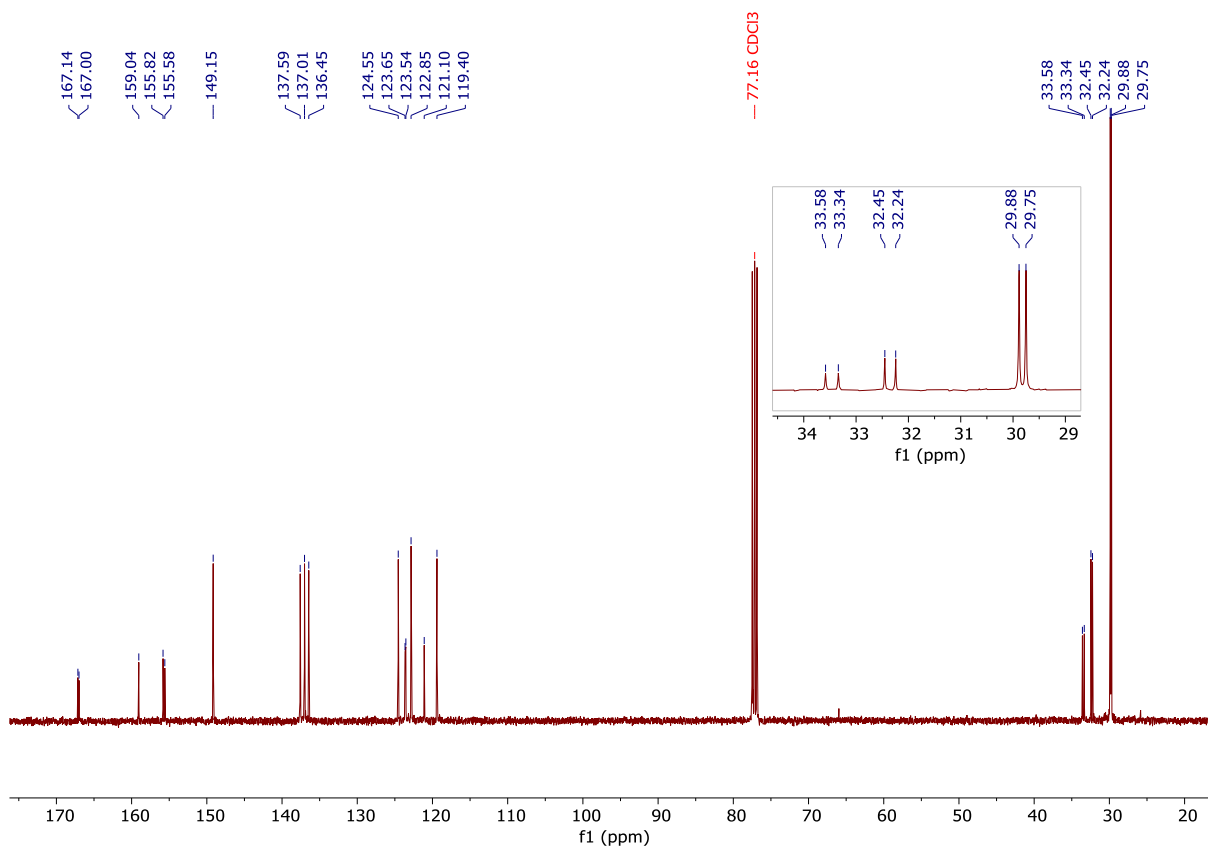

Figure S3.  $^{13}\text{C}\{^1\text{H}\}$  NMR spectrum of PNNN (101 MHz,  $\text{CDCl}_3$ , 298 K).

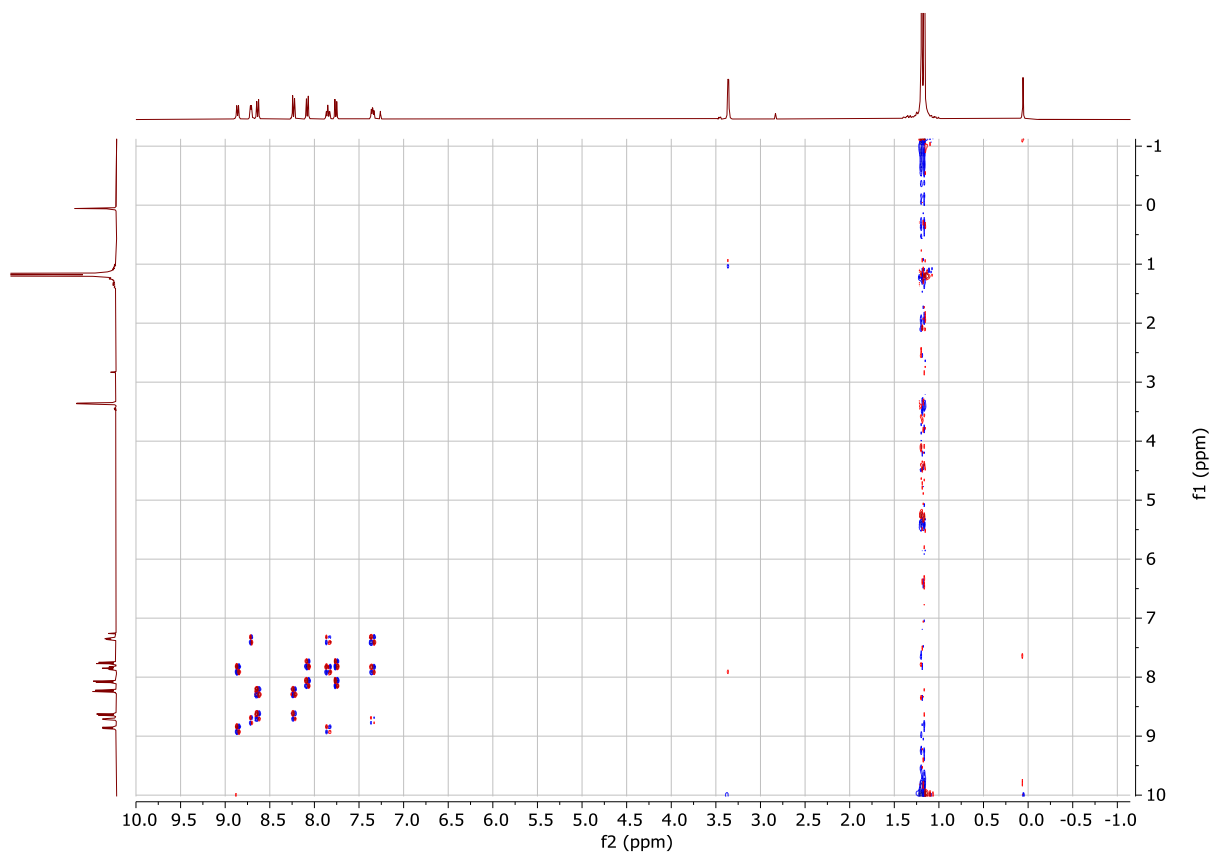

Figure S4.  $^1\text{H}\text{-}^1\text{H}$  COSY NMR spectrum of PNNN (400 MHz,  $\text{CDCl}_3$ , 298 K).

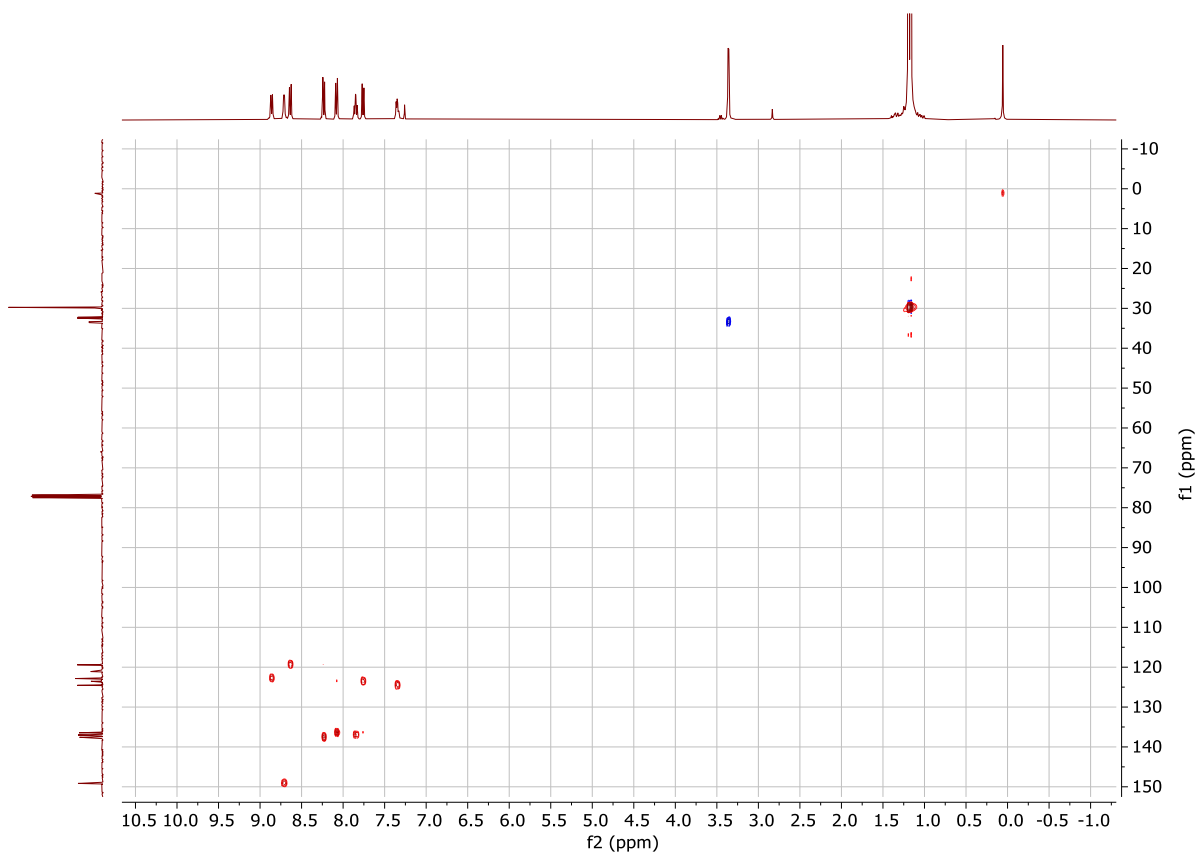

Figure S5.  $^1\text{H}$ - $^{13}\text{C}$  HSQC NMR spectrum of PNNN (101, 400 MHz,  $\text{CDCl}_3$ , 298 K).

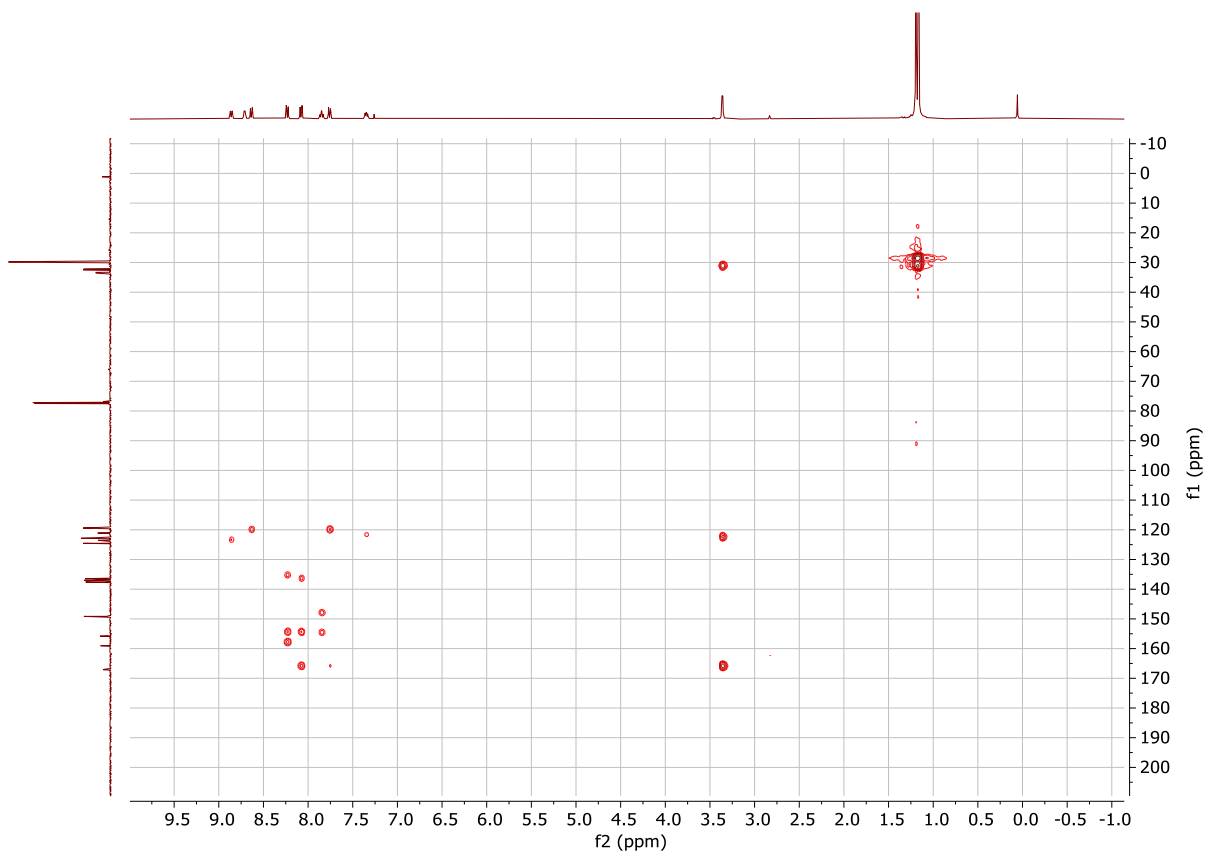

Figure S6.  $^1\text{H}$ - $^{13}\text{C}$  HMBC NMR spectrum of PNNN (101, 400 MHz,  $\text{CDCl}_3$ , 298 K).

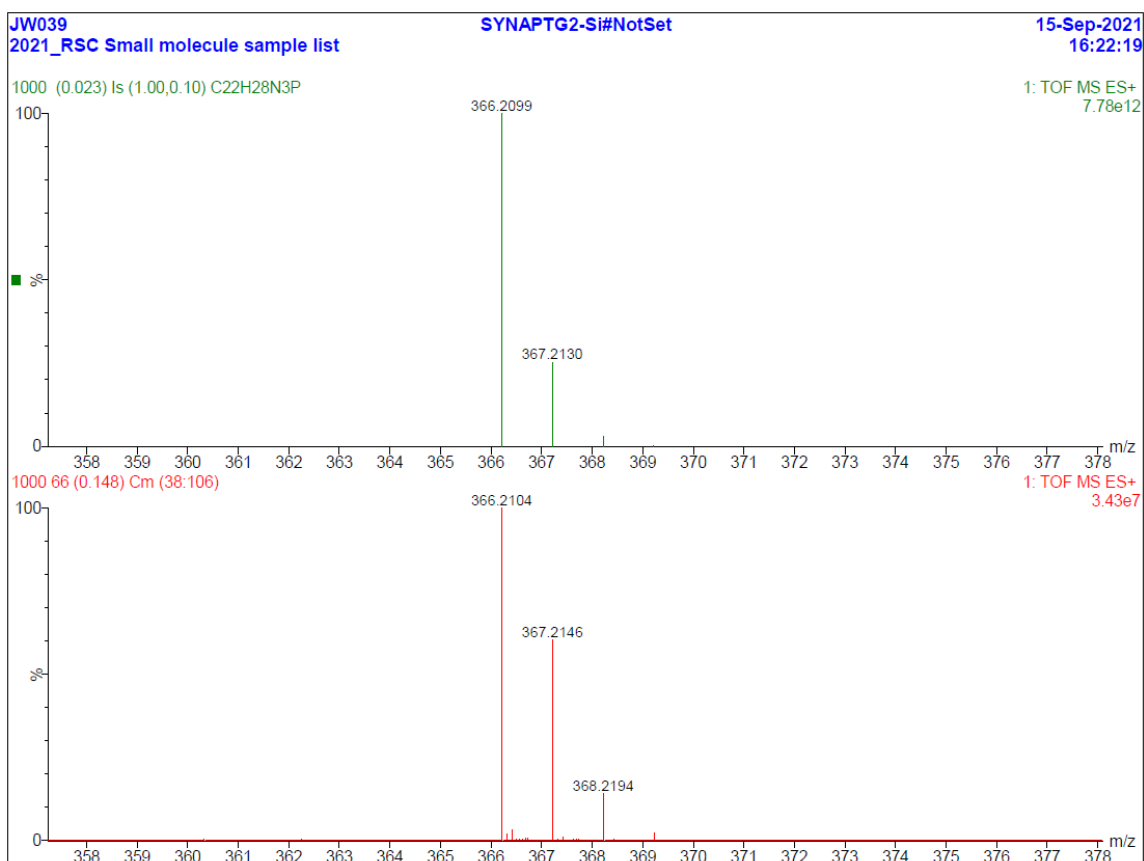

Figure S7. Experimental (bottom) and simulated (top) high resolution mass spectra (ESI+) of PNNN.

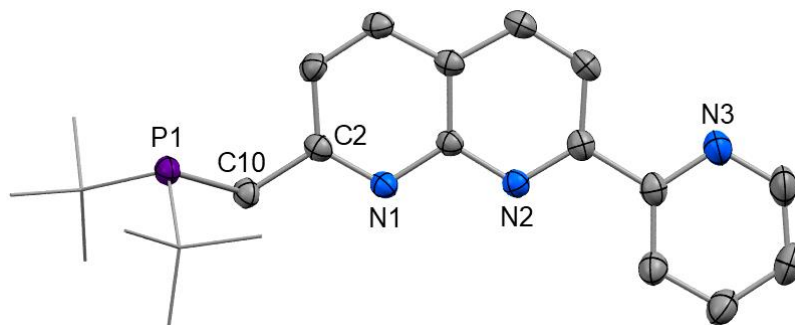

Figure S8. X-ray crystal structure of PNNN (50% displacement ellipsoids, H atoms and CHCl<sub>3</sub> solvent omitted). Selected bond lengths (Å) and degrees (°): P1–C10 1.869(2), C2–C10 1.506(3), N1–C2 1.322(3), P1–C10–C2 114.72(19).

## 2. Characterisation data for [Cu<sub>2</sub>Cl<sub>2</sub>(PNNN)] (1)

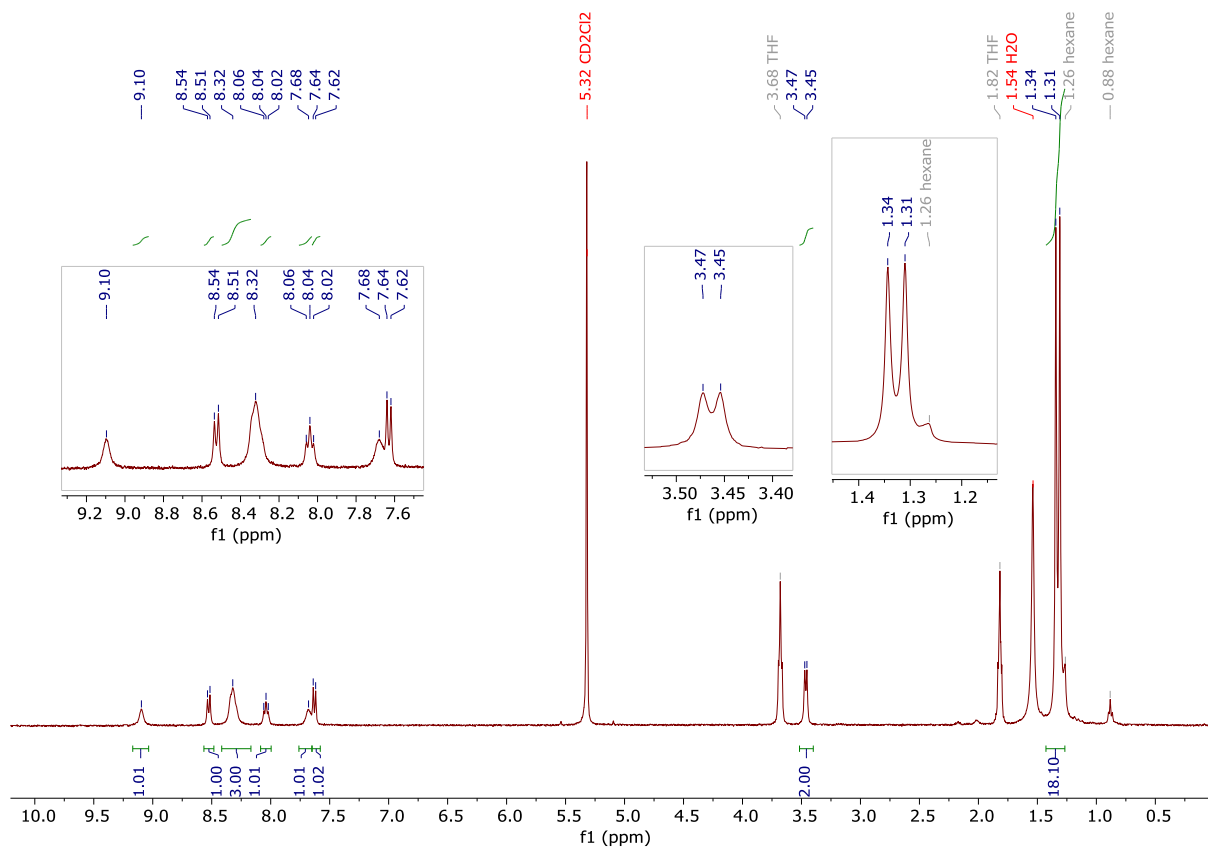

Figure S9. <sup>1</sup>H NMR spectrum of [Cu<sub>2</sub>Cl<sub>2</sub>(PNNN)] (1) (400 MHz, CD<sub>2</sub>Cl<sub>2</sub>, 298 K).

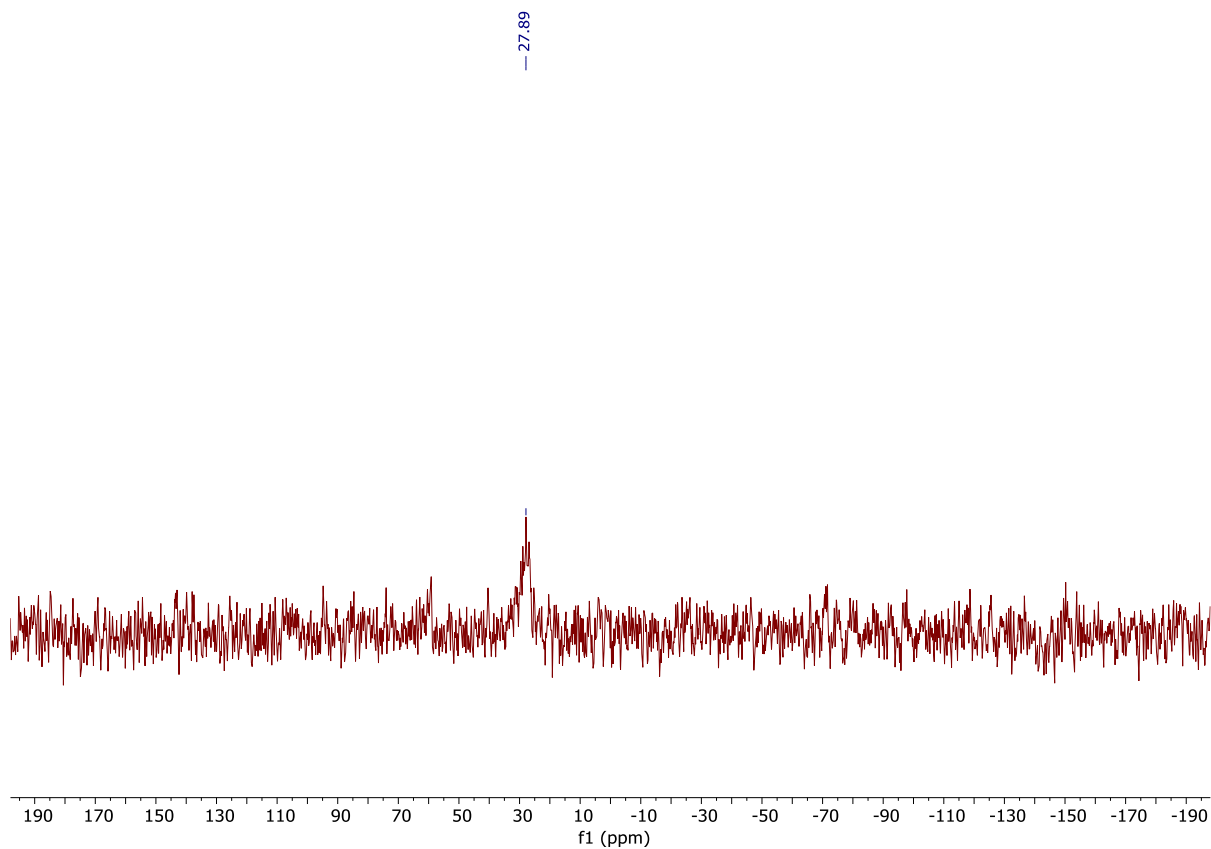

Figure S10. <sup>31</sup>P{<sup>1</sup>H} NMR spectrum of [Cu<sub>2</sub>Cl<sub>2</sub>(PNNN)] (1) (162 MHz, CD<sub>2</sub>Cl<sub>2</sub>, 298 K).

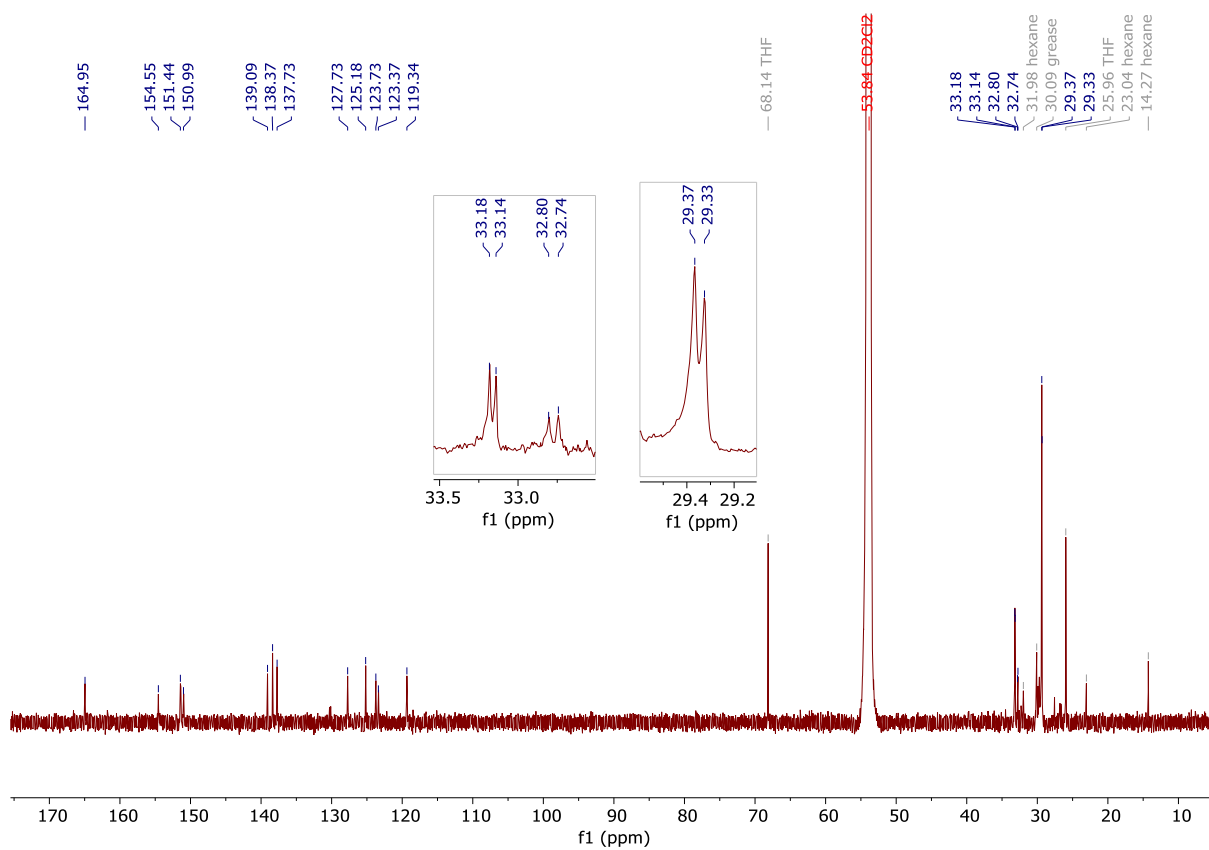

Figure S11.  $^{13}\text{C}\{^1\text{H}\}$  NMR spectrum of  $[\text{Cu}_2\text{Cl}_2(\text{PNNN})]$  (**1**) (201 MHz,  $\text{CD}_2\text{Cl}_2$ , 298 K).

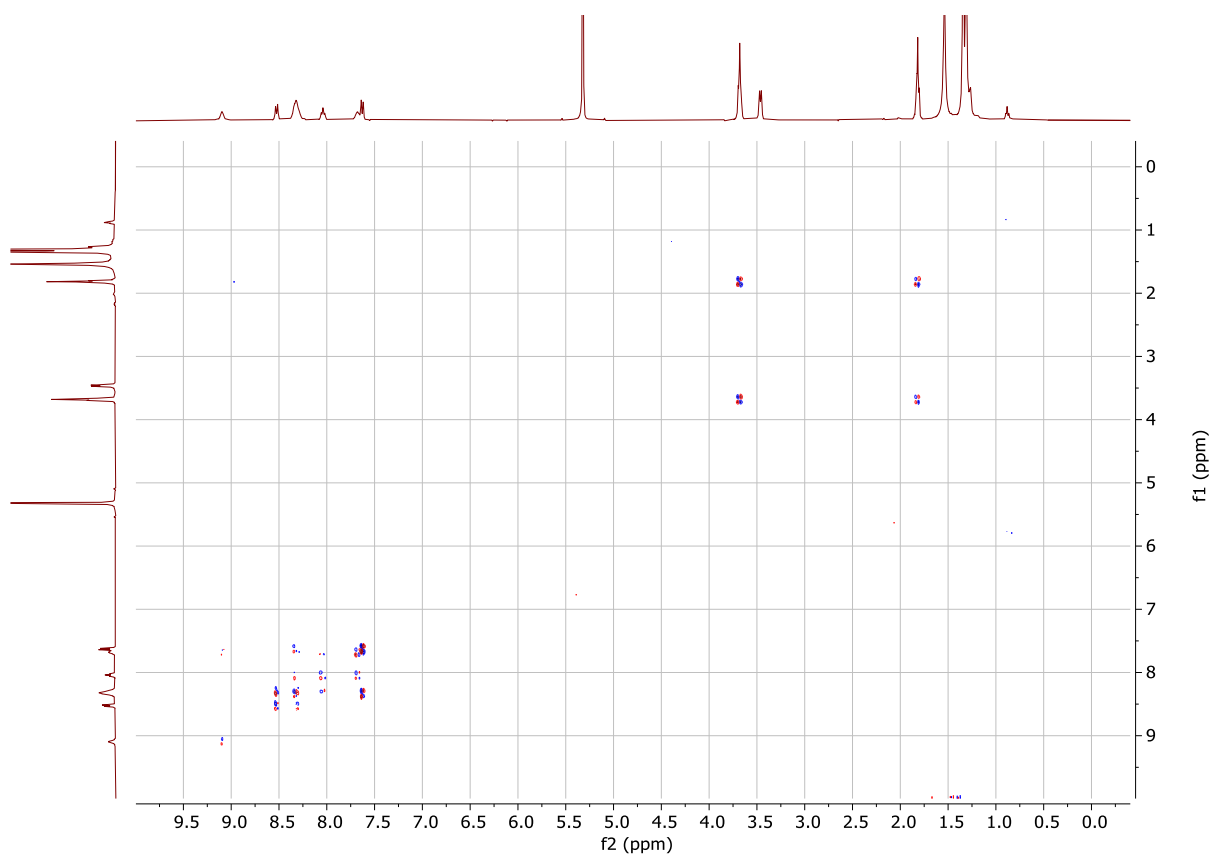

Figure S12.  $^1\text{H}-^1\text{H}$  COSY NMR spectrum of  $[\text{Cu}_2\text{Cl}_2(\text{PNNN})]$  (**1**) (400 MHz,  $\text{CD}_2\text{Cl}_2$ , 298 K).

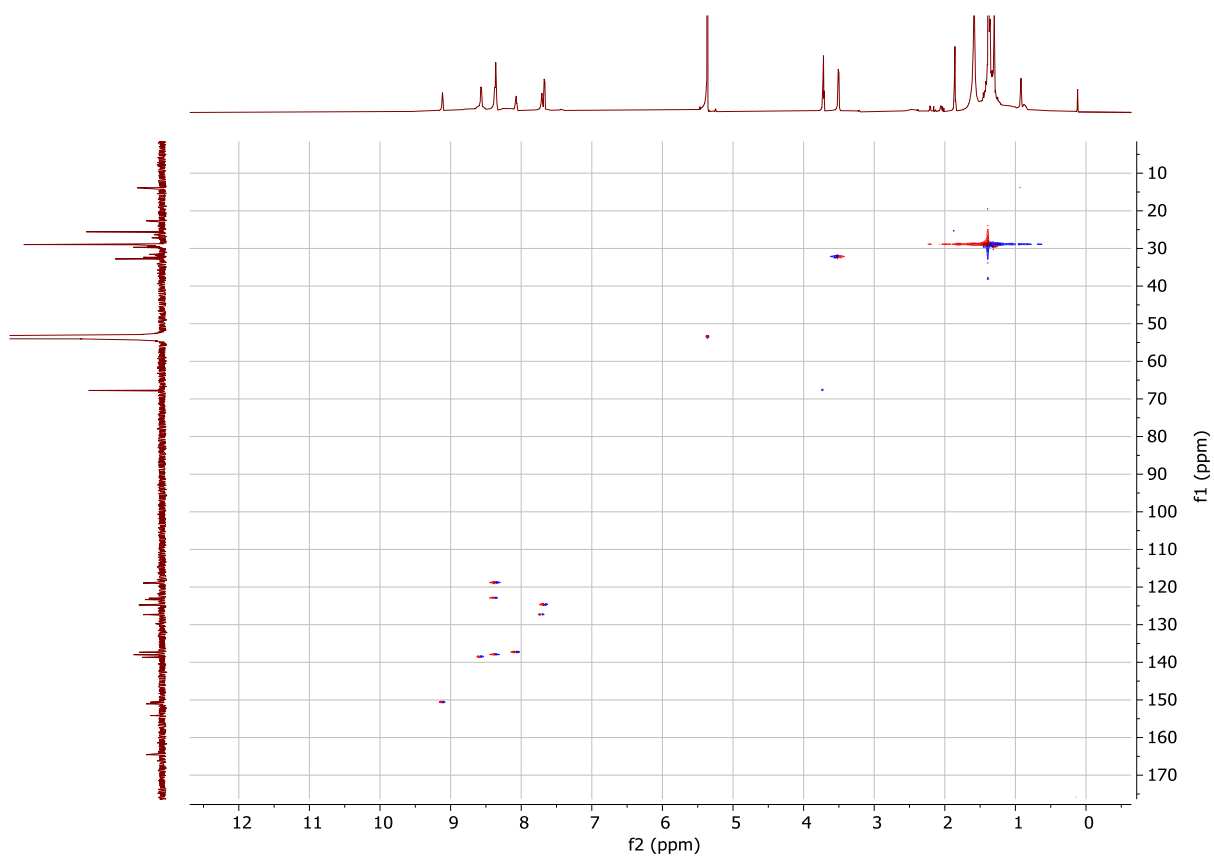

Figure S13.  $^1\text{H}$ - $^{13}\text{C}$  HSQC NMR spectrum of  $[\text{Cu}_2\text{Cl}_2(\text{PNNN})]$  (**1**) (201, 800 MHz,  $\text{CD}_2\text{Cl}_2$ , 298 K).

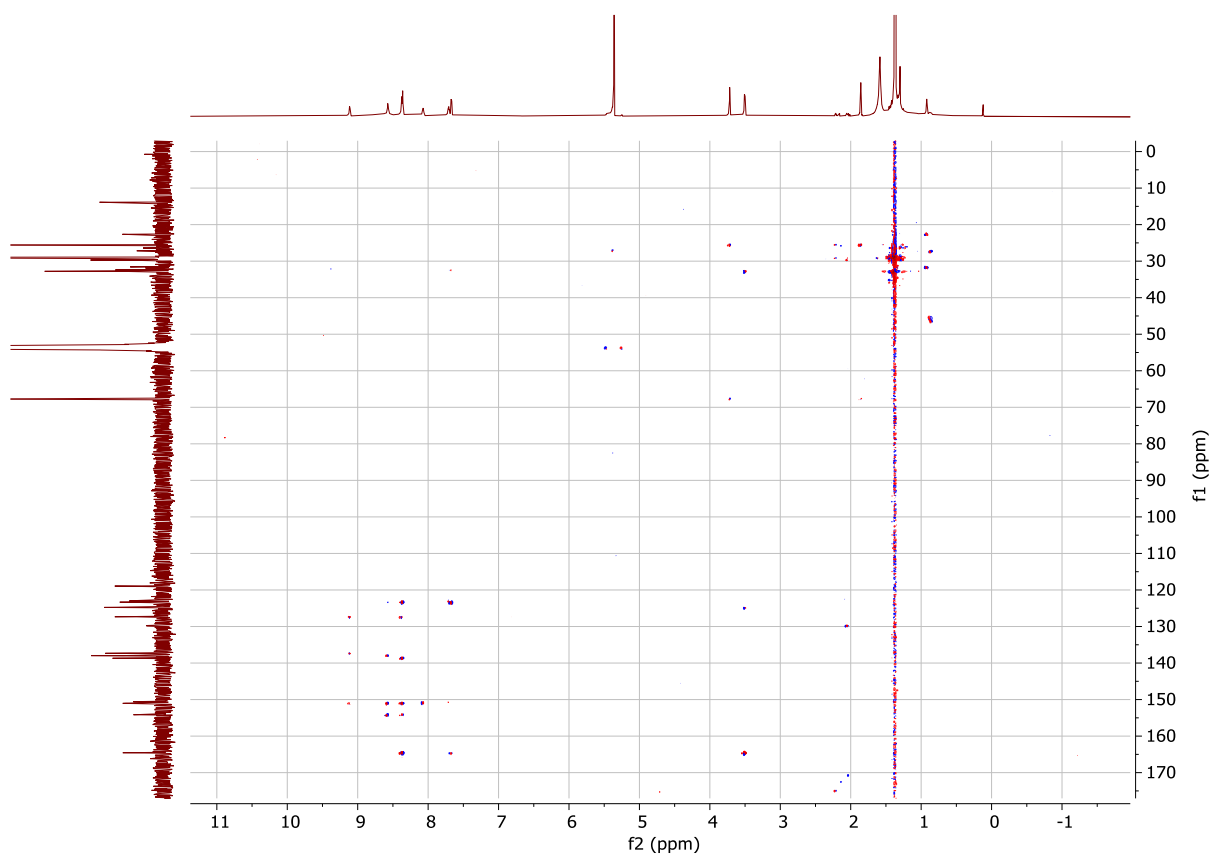

Figure S14.  $^1\text{H}$ - $^{13}\text{C}$  HMBC NMR spectrum of  $[\text{Cu}_2\text{Cl}_2(\text{PNNN})]$  (**1**) (201, 800 MHz,  $\text{CD}_2\text{Cl}_2$ , 298 K).



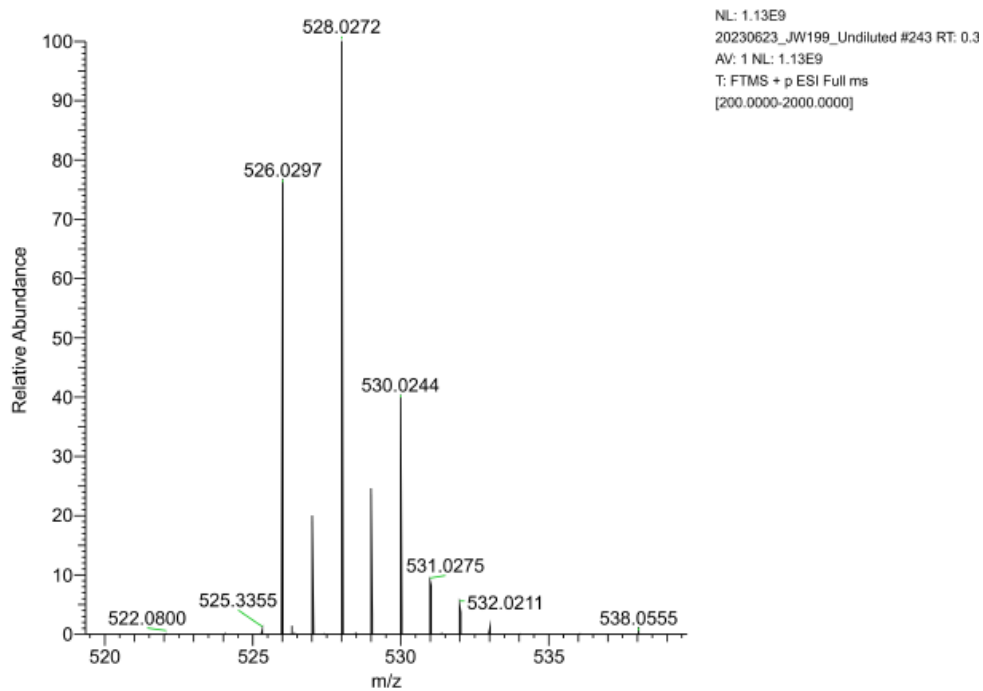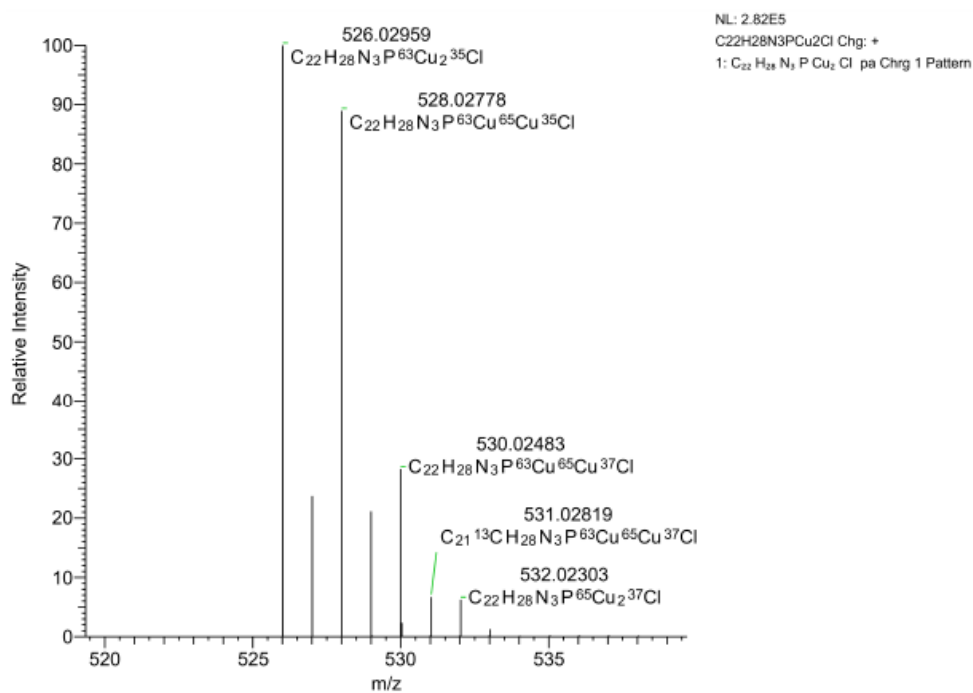

Figure S15. Experimental (top) and simulated (bottom) high resolution mass spectra (ESI+) of  $[\text{Cu}_2\text{Cl}_2(\text{PNNN})]$  (**1**).

### 3. Characterisation data for [RuCl(cymene)(PNNN)]Cl ([2]Cl)

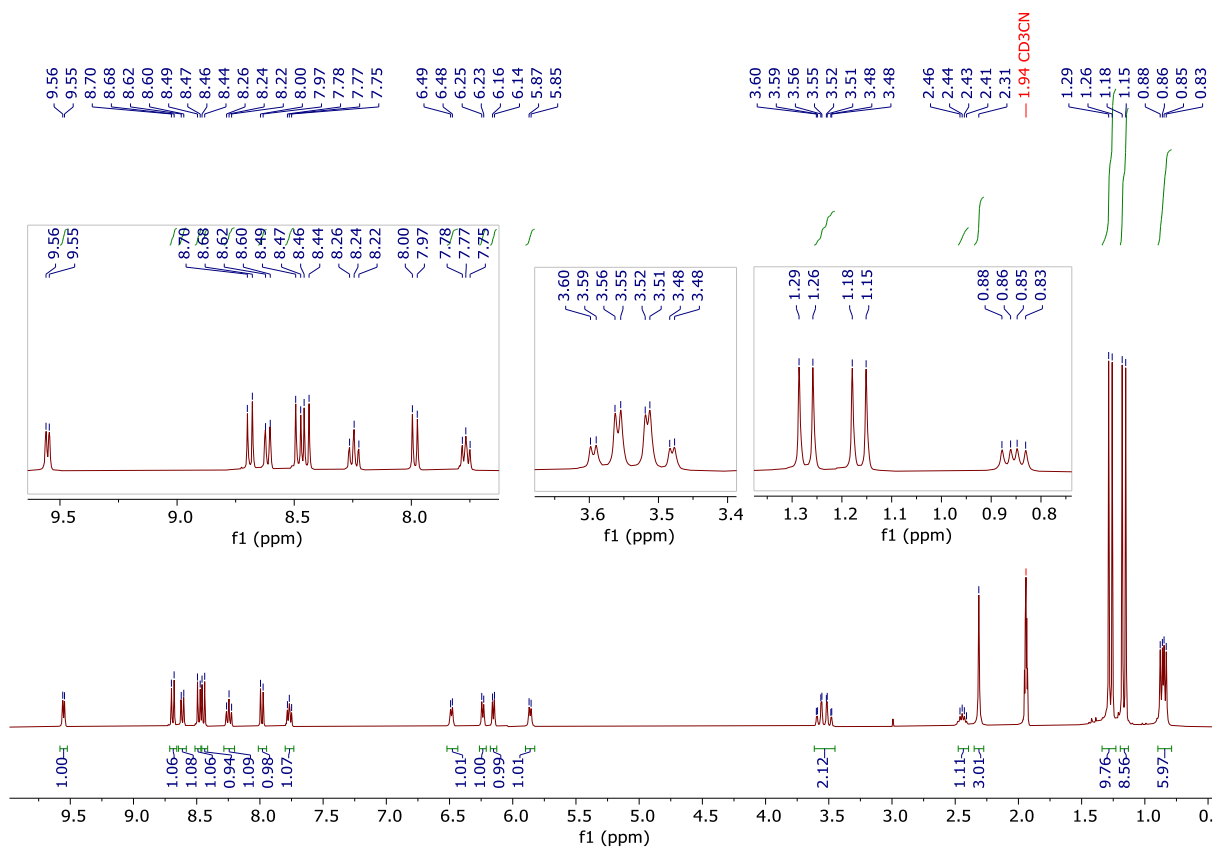

Figure S16.  $^1\text{H}$  NMR spectrum of [RuCl(cymene)(PNNN)]Cl ([2]Cl) (400 MHz,  $\text{CD}_3\text{CN}$ , 298 K).

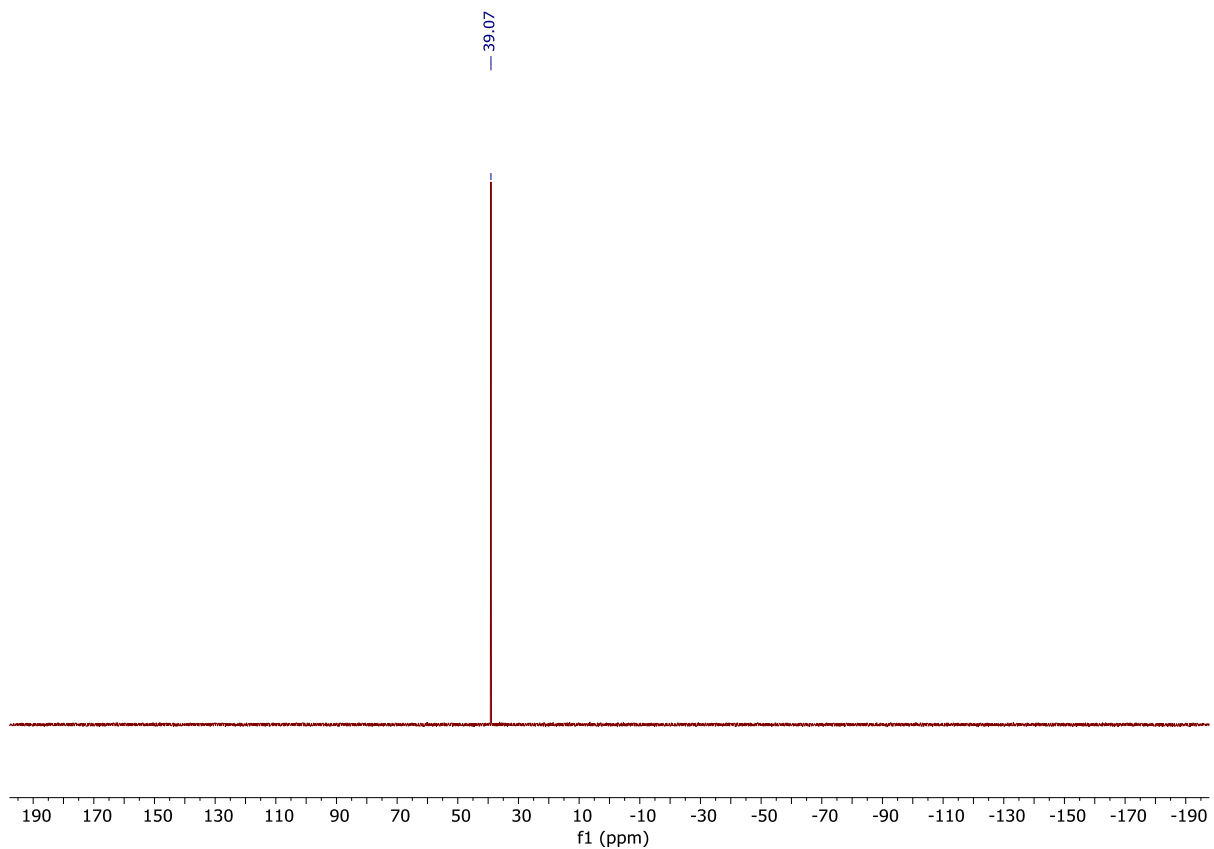

Figure S17.  $^{31}\text{P}\{^1\text{H}\}$  NMR spectrum of [RuCl(cymene)(PNNN)]Cl ([2]Cl) (162 MHz,  $\text{CD}_3\text{CN}$ , 298 K).

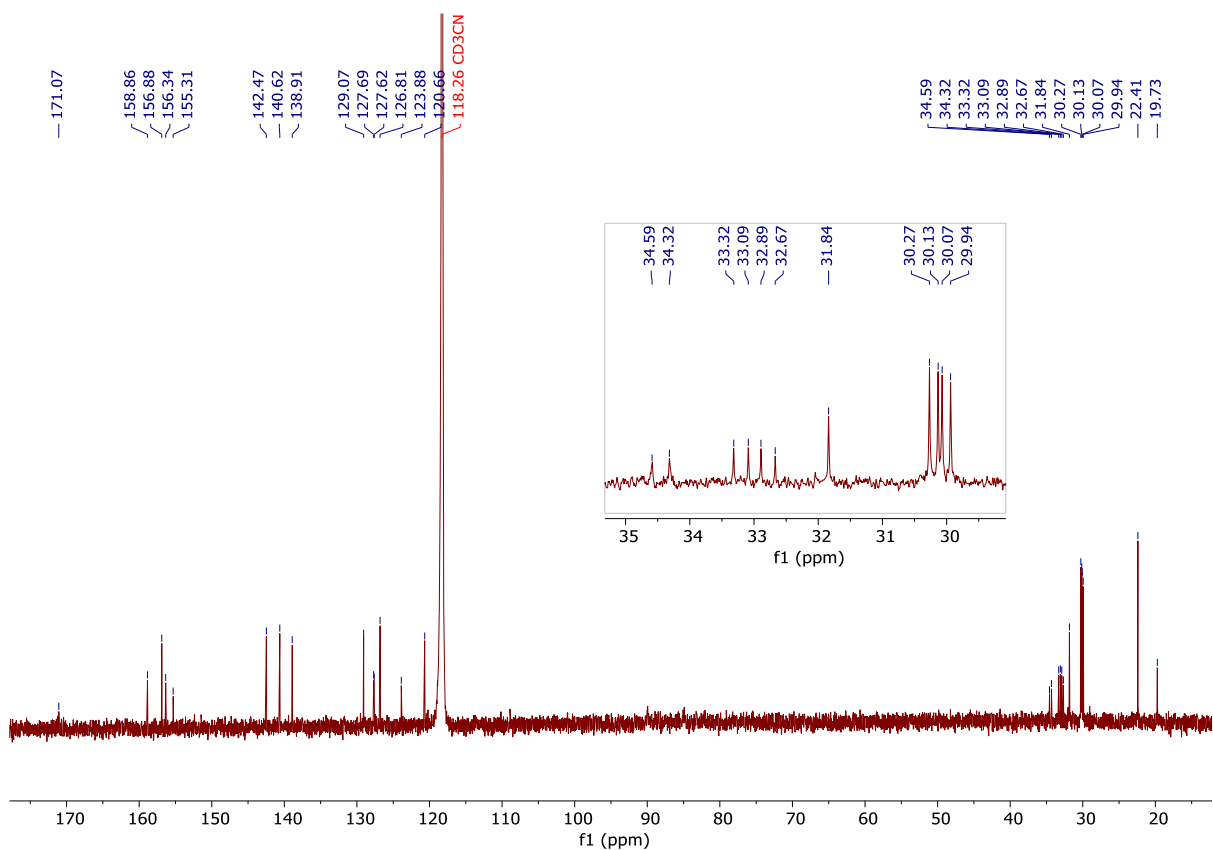

Figure S18.  $^{13}\text{C}\{^1\text{H}\}$  NMR spectrum of  $[\text{RuCl}(\text{cymene})(\text{PNNN})]\text{Cl}$  (**[2]Cl**) (101 MHz,  $\text{CD}_3\text{CN}$ , 298 K).

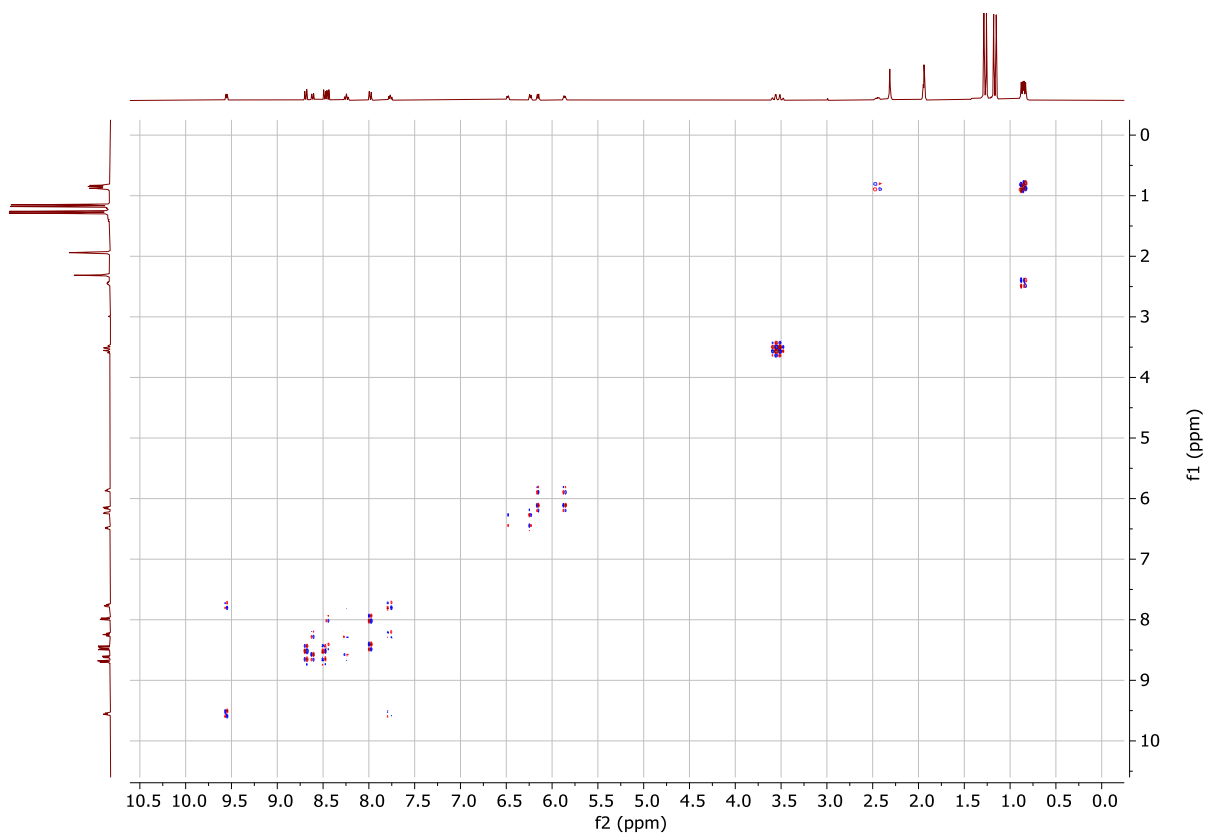

Figure S19.  $^1\text{H}-^1\text{H}$  COSY NMR spectrum of  $[\text{RuCl}(\text{cymene})(\text{PNNN})]\text{Cl}$  (**[2]Cl**) (400 MHz,  $\text{CD}_3\text{CN}$ , 298 K).

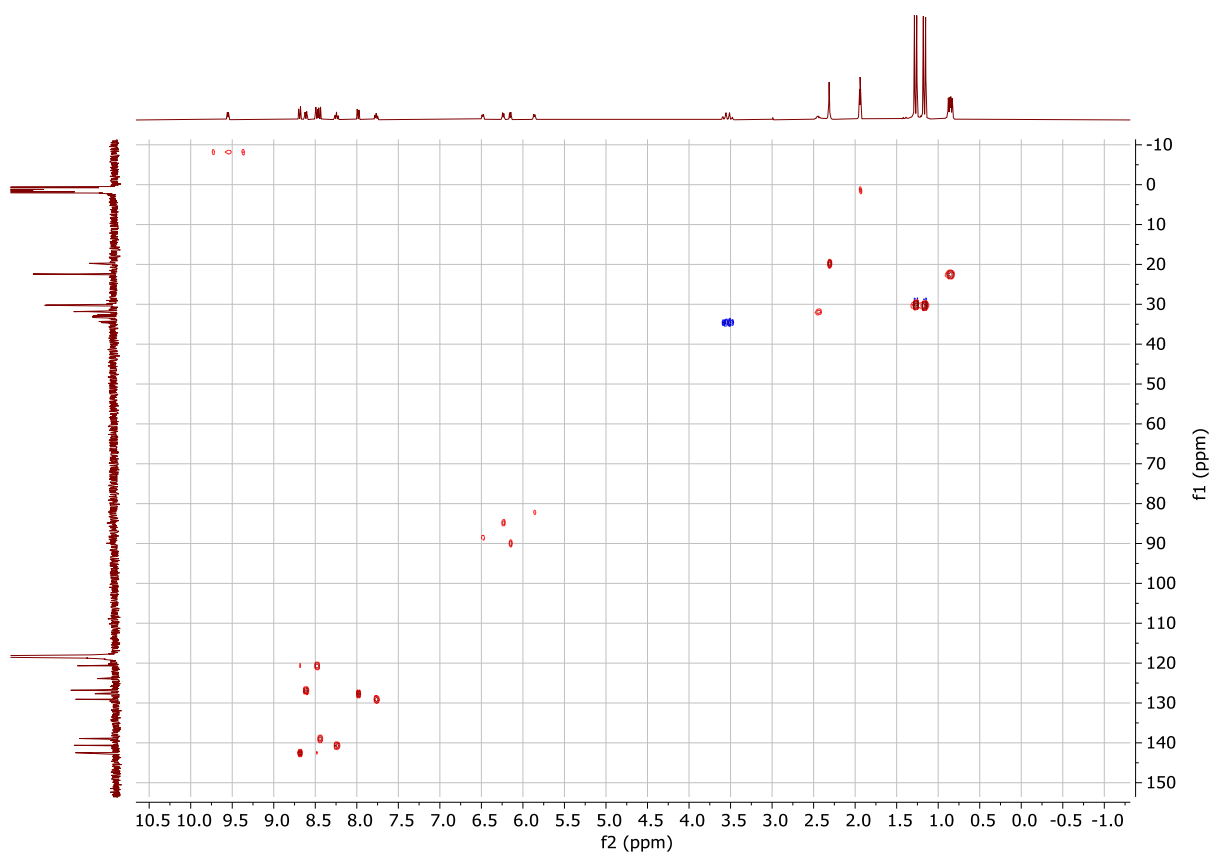

Figure S20.  $^1\text{H}$ - $^{13}\text{C}$  HSQC NMR spectrum of  $[\text{RuCl}(\text{cymene})(\text{PNNN})]\text{Cl}$  (**[2]Cl**) (101, 400 MHz,  $\text{CD}_3\text{CN}$ , 298 K).

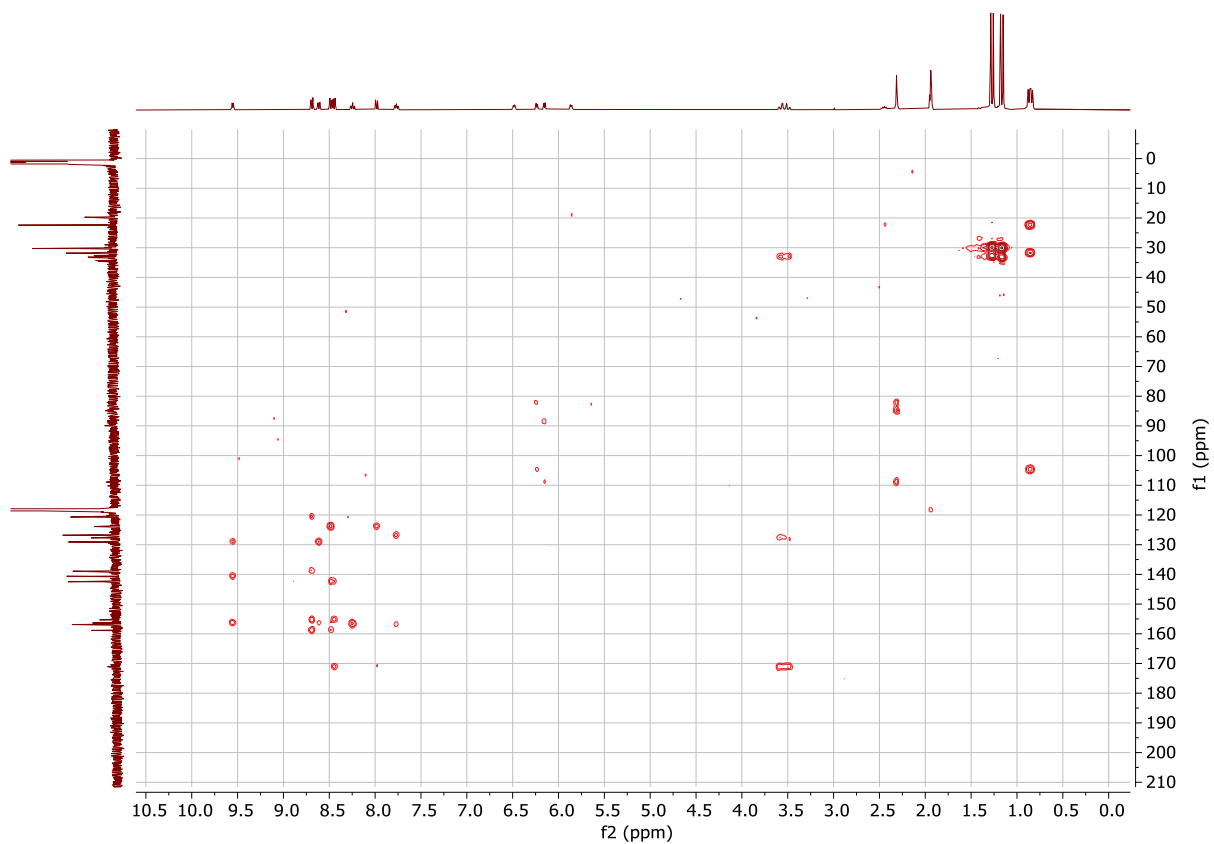

Figure S21.  $^1\text{H}$ - $^{13}\text{C}$  HMBC NMR spectrum of  $[\text{RuCl}(\text{cymene})(\text{PNNN})]\text{Cl}$  (**[2]Cl**) (101, 400 MHz,  $\text{CD}_3\text{CN}$ , 298 K).

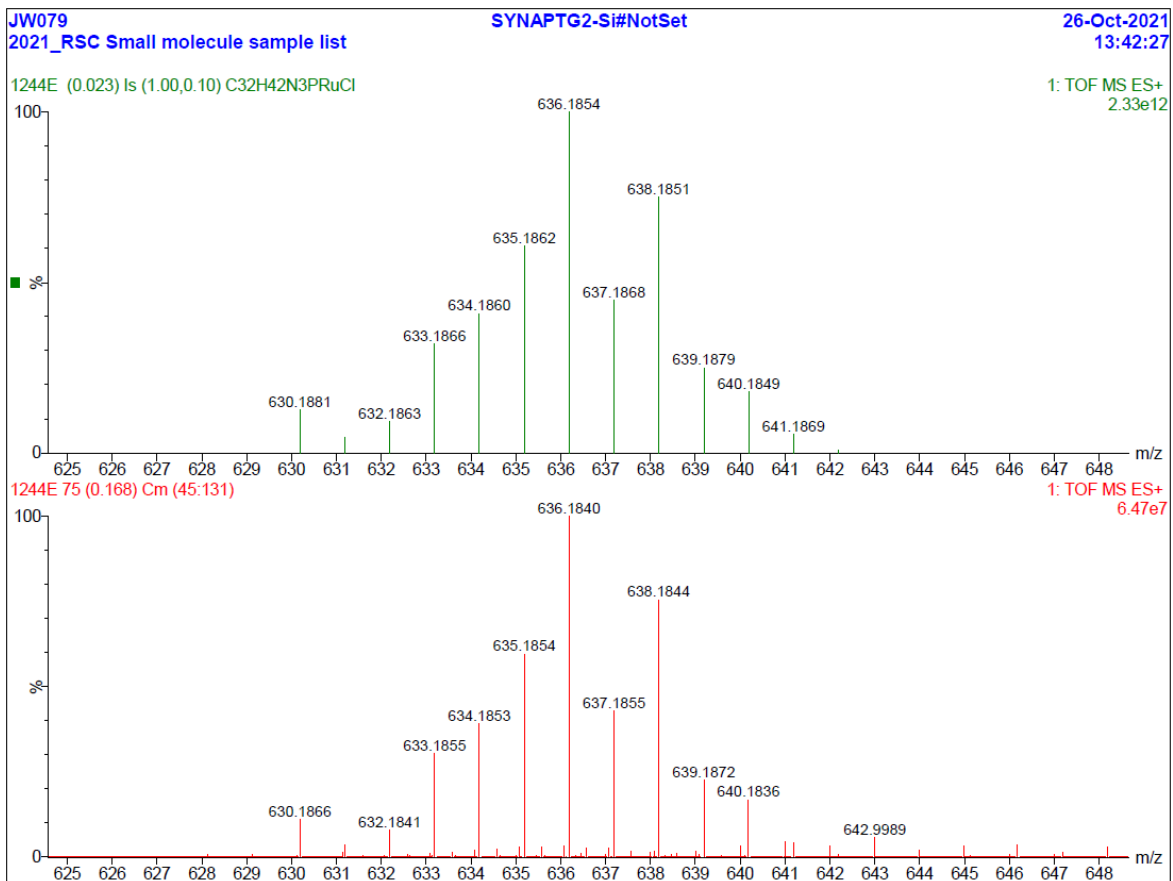

Figure S22. Experimental (bottom) and simulated (top) high resolution mass spectra (ESI+) of [RuCl(cymene)(PNNN)]Cl (**[2]Cl**).

#### 4. Characterisation data for [RuCl(cymene)(PNNN)]PF<sub>6</sub> ([2]PF<sub>6</sub>)

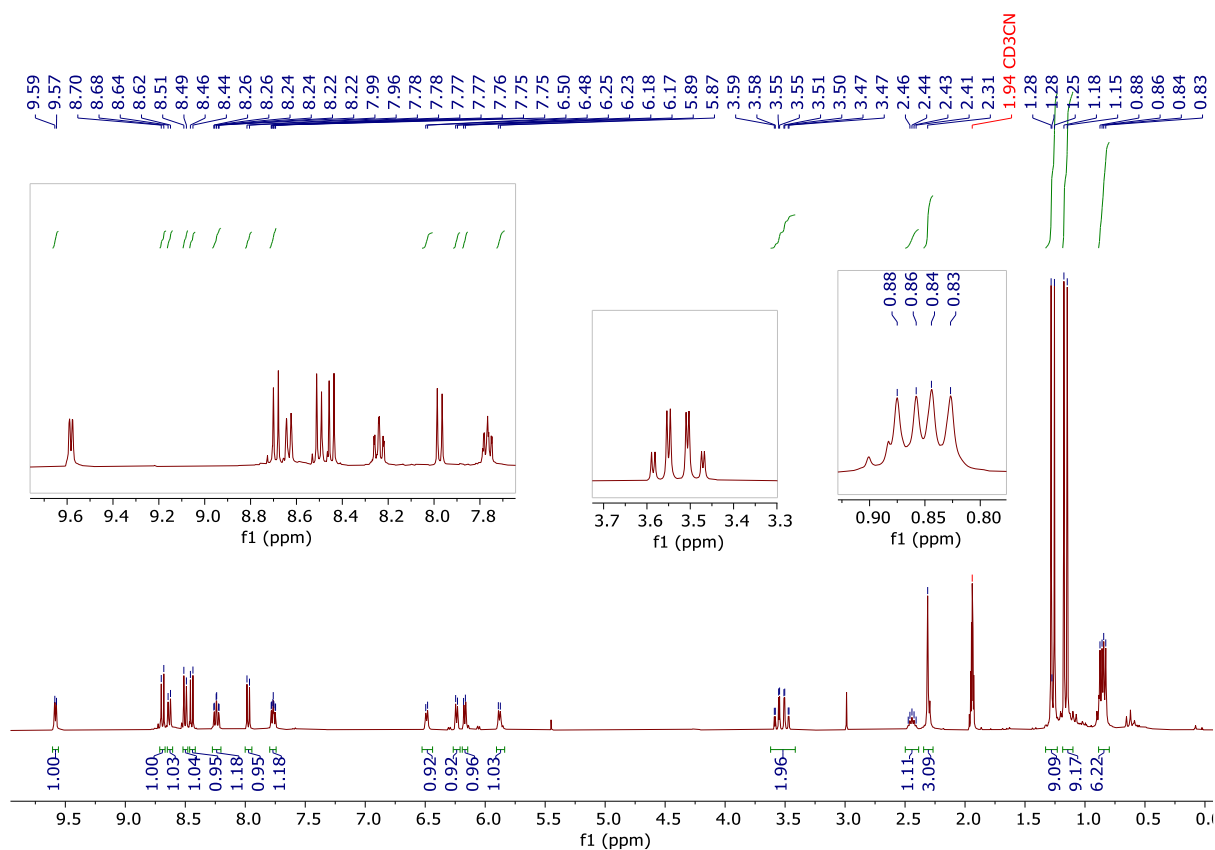

Figure S23. <sup>1</sup>H NMR spectrum of [RuCl(cymene)(PNNN)]PF<sub>6</sub> ([2]PF<sub>6</sub>) (400 MHz, CD<sub>3</sub>CN, 298 K).

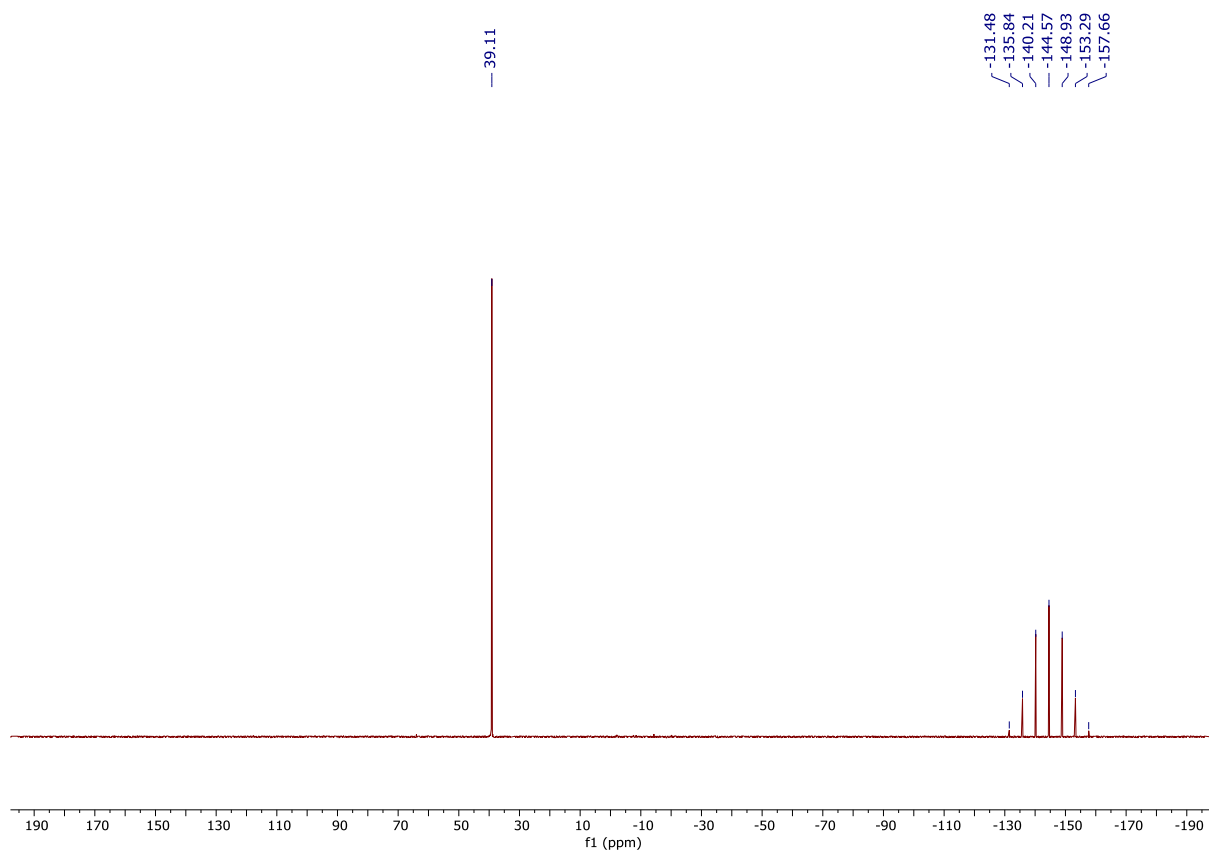

Figure S24. <sup>31</sup>P{<sup>1</sup>H} NMR spectrum of [RuCl(cymene)(PNNN)]PF<sub>6</sub> ([2]PF<sub>6</sub>) (162 MHz, CD<sub>3</sub>CN, 298 K).

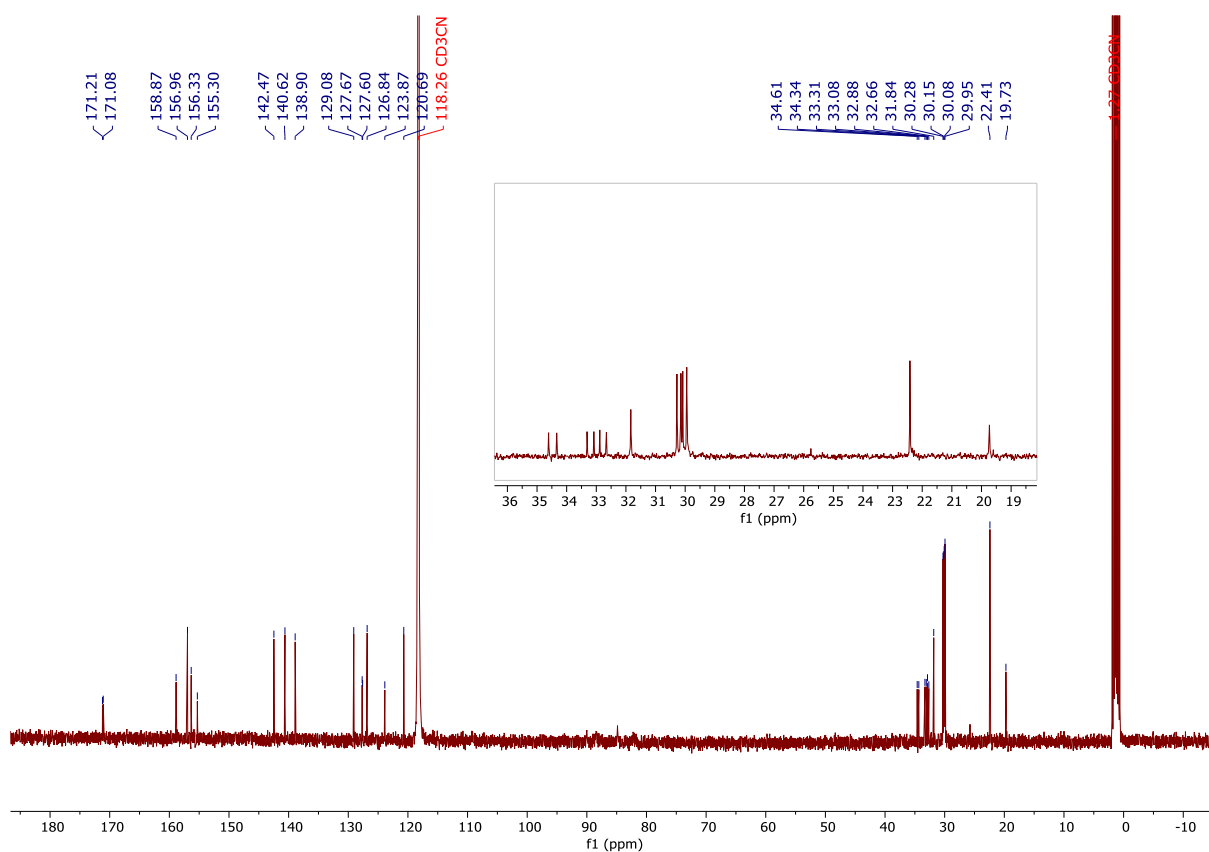

Figure S25.  $^{13}\text{C}\{^1\text{H}\}$  NMR spectrum of  $[\text{RuCl}(\text{cymene})(\text{PNNN})]\text{PF}_6$  (**[2]PF<sub>6</sub>**) (101 MHz,  $\text{CD}_3\text{CN}$ , 298 K).

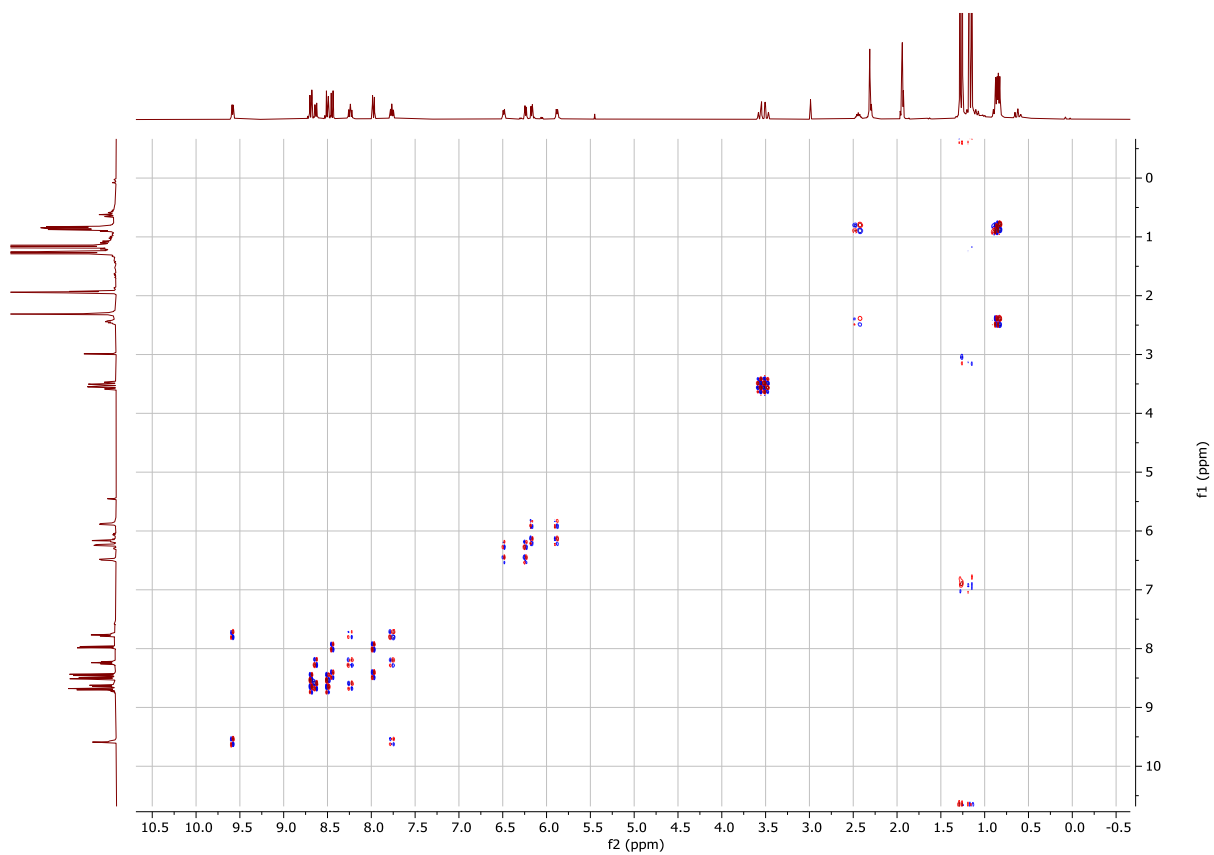

Figure S26.  $^1\text{H}\text{-}^1\text{H}$  COSY NMR spectrum of  $[\text{RuCl}(\text{cymene})(\text{PNNN})]\text{PF}_6$  (**[2]PF<sub>6</sub>**) (400 MHz,  $\text{CD}_3\text{CN}$ , 298 K).

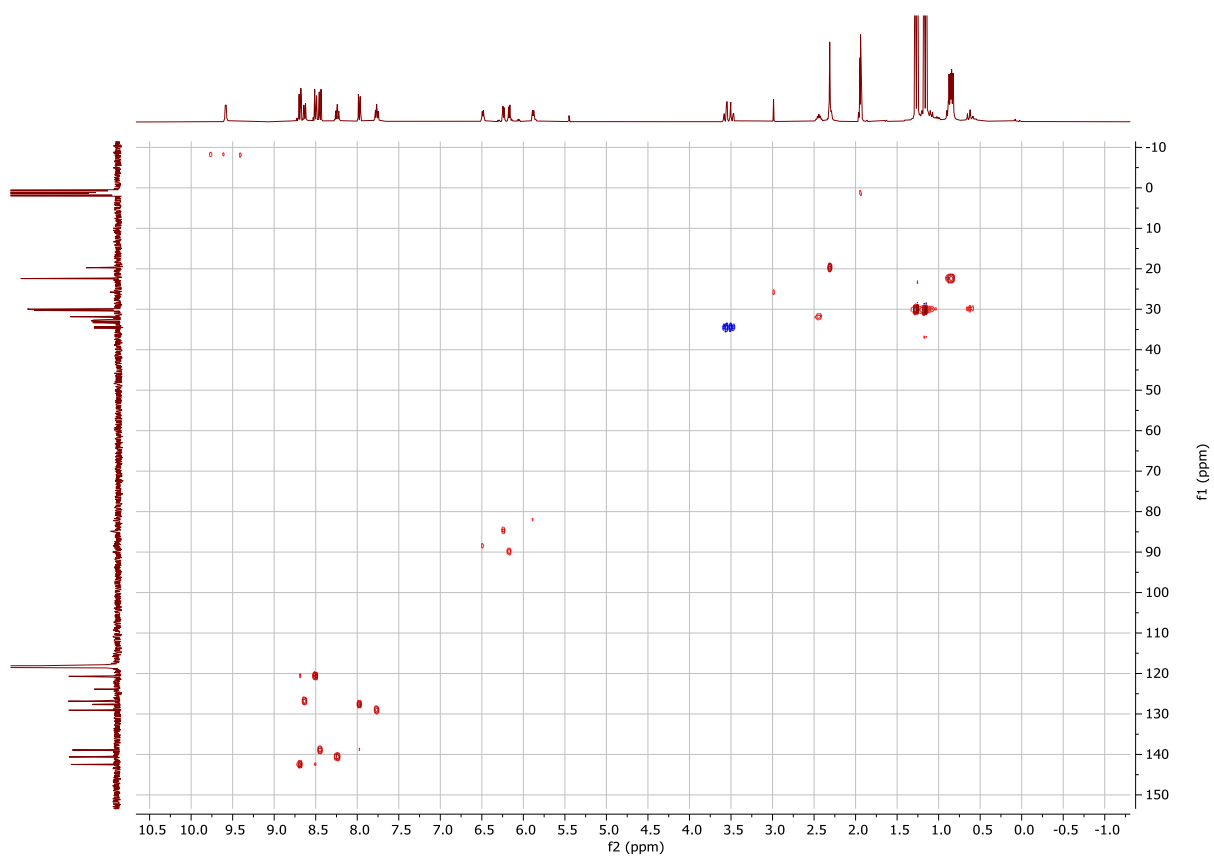

Figure S27.  $^1\text{H}$ - $^{13}\text{C}$  HSQC NMR spectrum of  $[\text{RuCl}(\text{cymene})(\text{PNNN})]\text{PF}_6$  (**[2]PF<sub>6</sub>**) (101, 400 MHz,  $\text{CD}_3\text{CN}$ , 298 K).

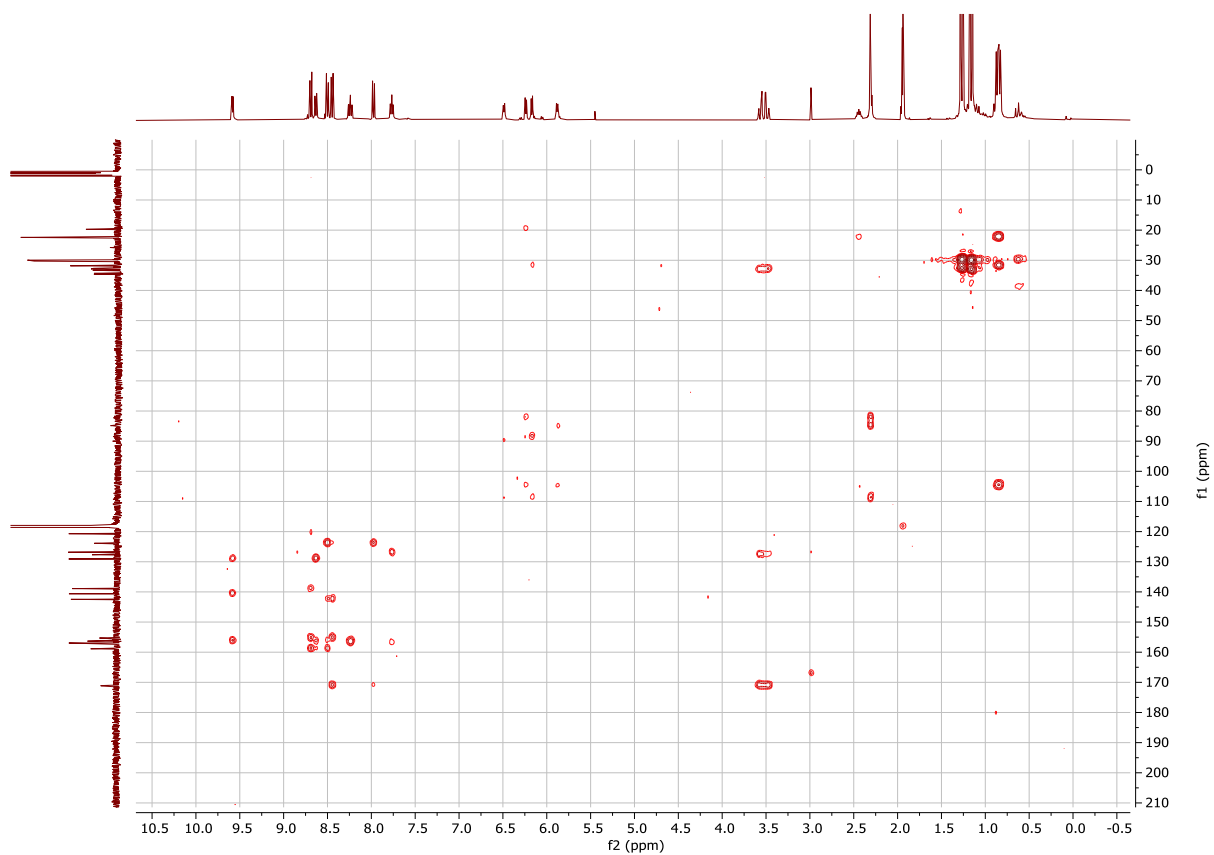

Figure S28.  $^1\text{H}$ - $^{13}\text{C}$  HMBC NMR spectrum of  $[\text{RuCl}(\text{cymene})(\text{PNNN})]\text{PF}_6$  (**[2]PF<sub>6</sub>**) (101, 400 MHz,  $\text{CD}_3\text{CN}$ , 298 K).



## 5. Characterisation data for [RuCuCl<sub>3</sub>(cymene)(PNNN)] (3)

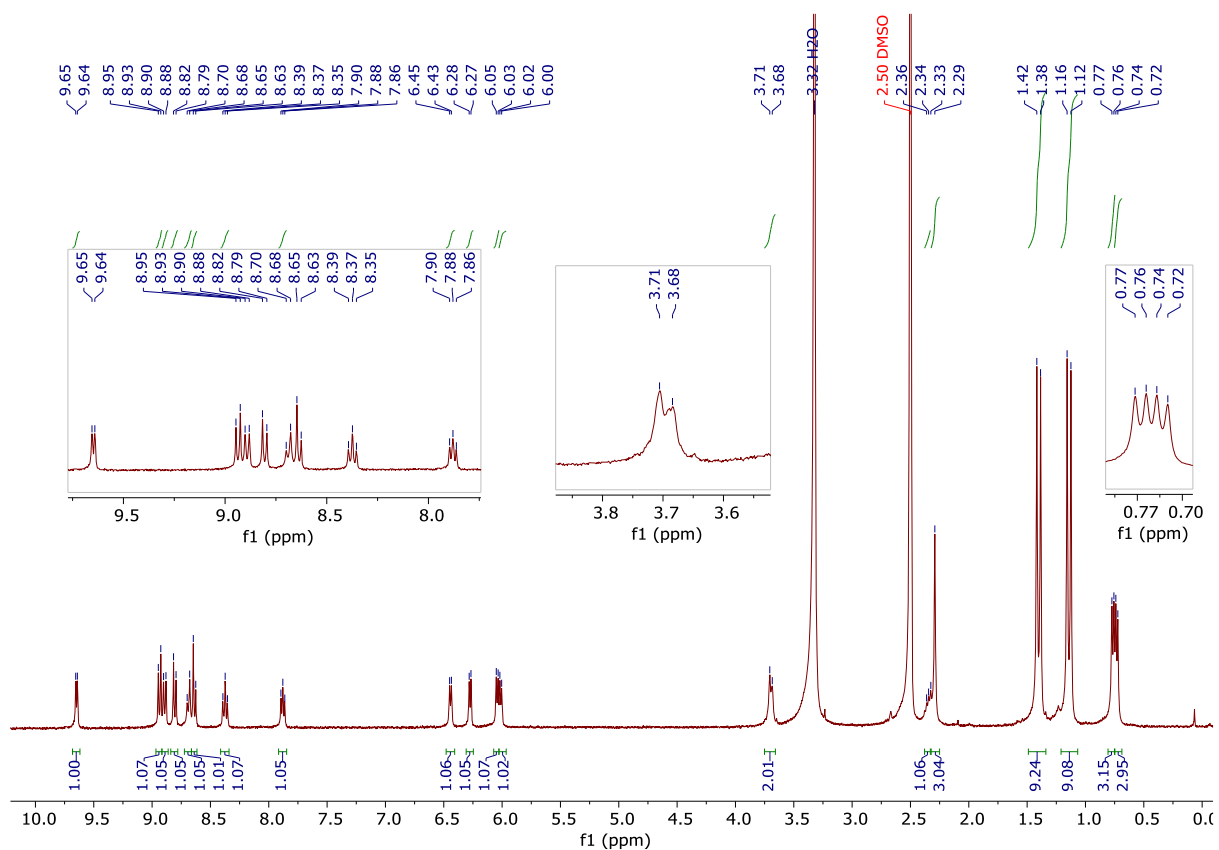

Figure S29. <sup>1</sup>H NMR spectrum of [RuCuCl<sub>3</sub>(cymene)(PNNN)] (3) (400 MHz, (CD<sub>3</sub>)<sub>2</sub>SO, 298 K).

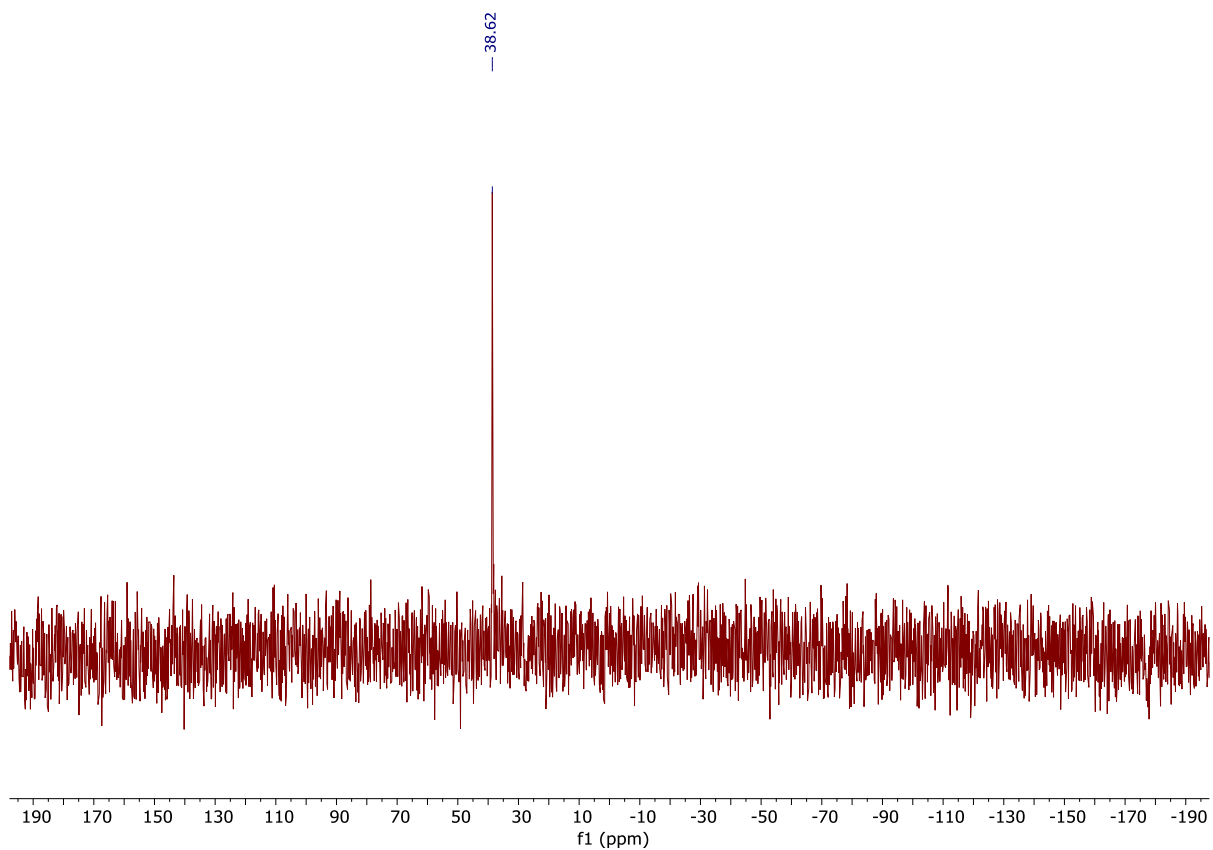

Figure S30. <sup>31</sup>P{<sup>1</sup>H} NMR spectrum of [RuCuCl<sub>3</sub>(cymene)(PNNN)] (3) (162 MHz, (CD<sub>3</sub>)<sub>2</sub>SO, 298 K).

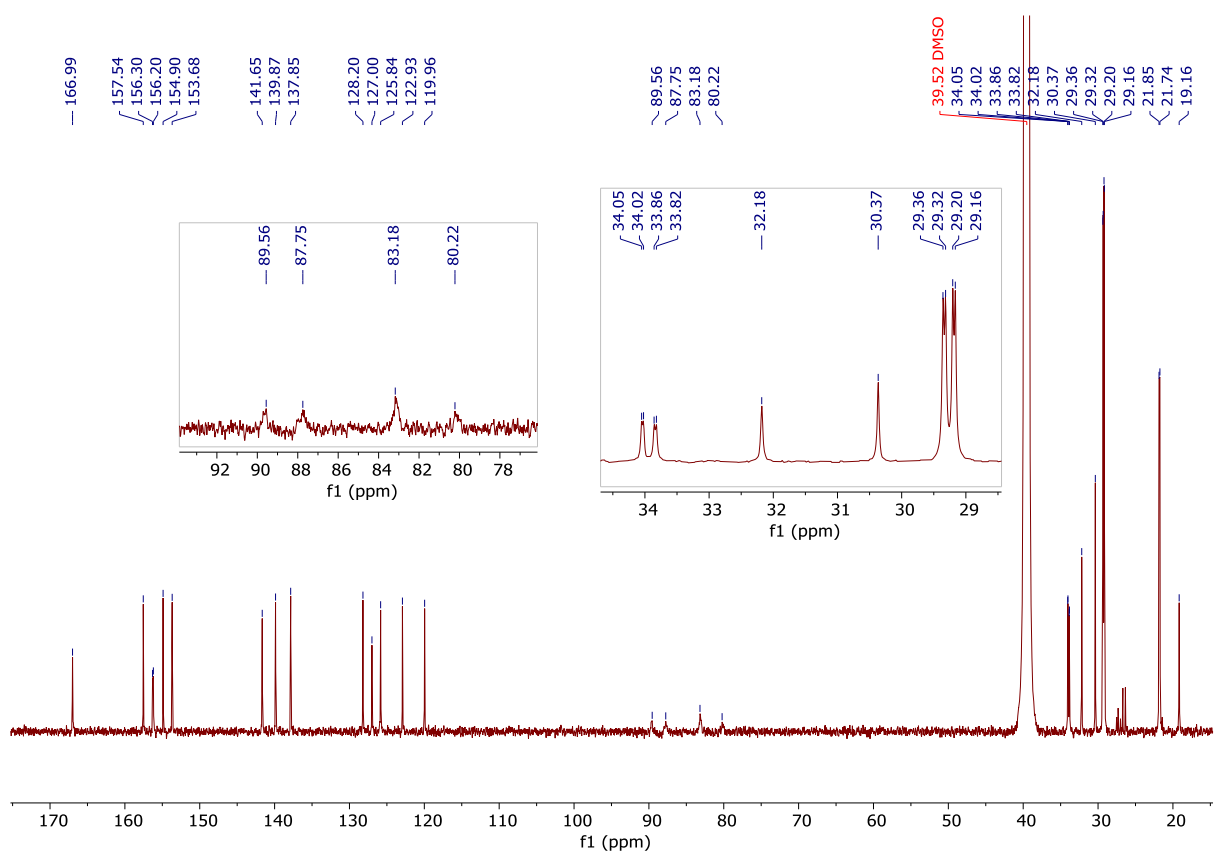

Figure S31.  $^{13}\text{C}\{^1\text{H}\}$  NMR spectrum of  $[\text{RuCuCl}_3(\text{cymene})(\text{PNNN})]$  (**3**) (201 MHz,  $(\text{CD}_3)_2\text{SO}$ , 298 K).

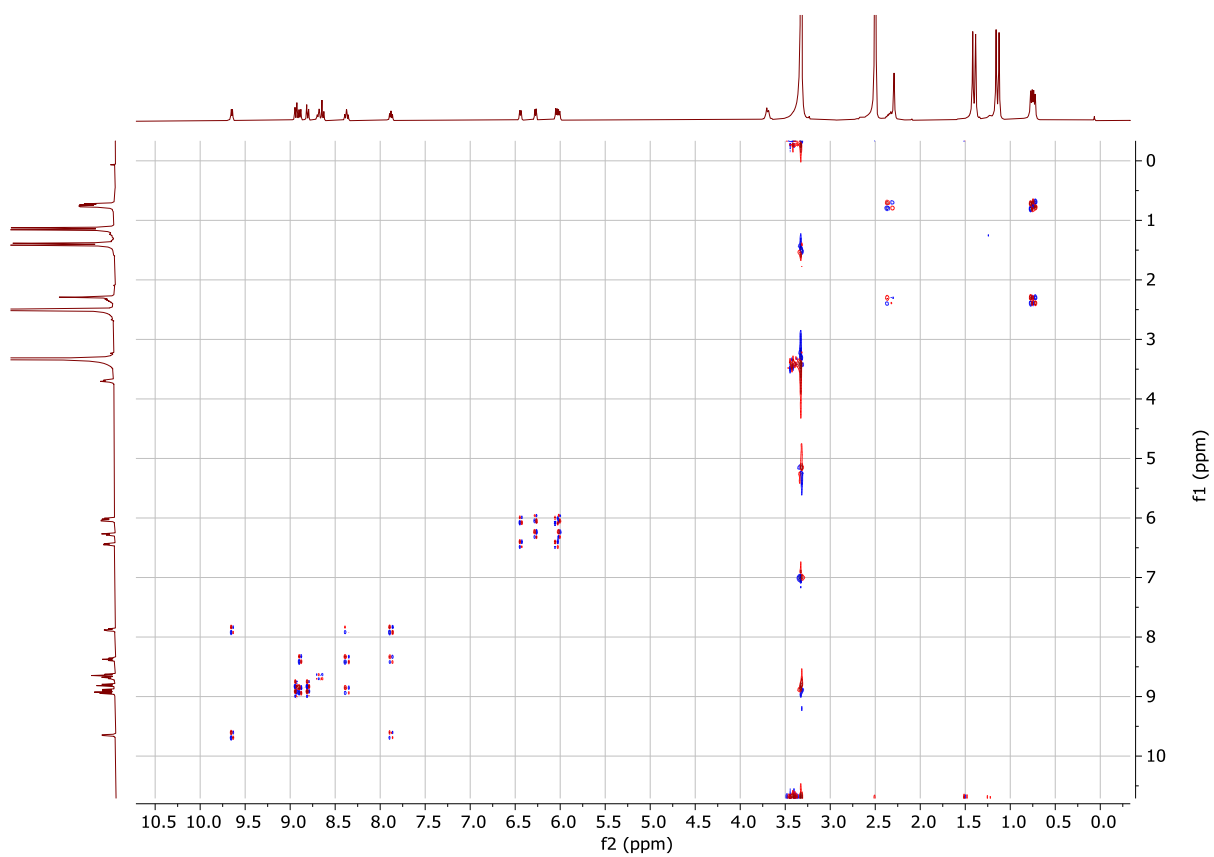

Figure S32.  $^1\text{H}$ - $^1\text{H}$  COSY NMR spectrum of  $[\text{RuCuCl}_3(\text{cymene})(\text{PNNN})]$  (**3**) (400 MHz,  $(\text{CD}_3)_2\text{SO}$ , 298 K).

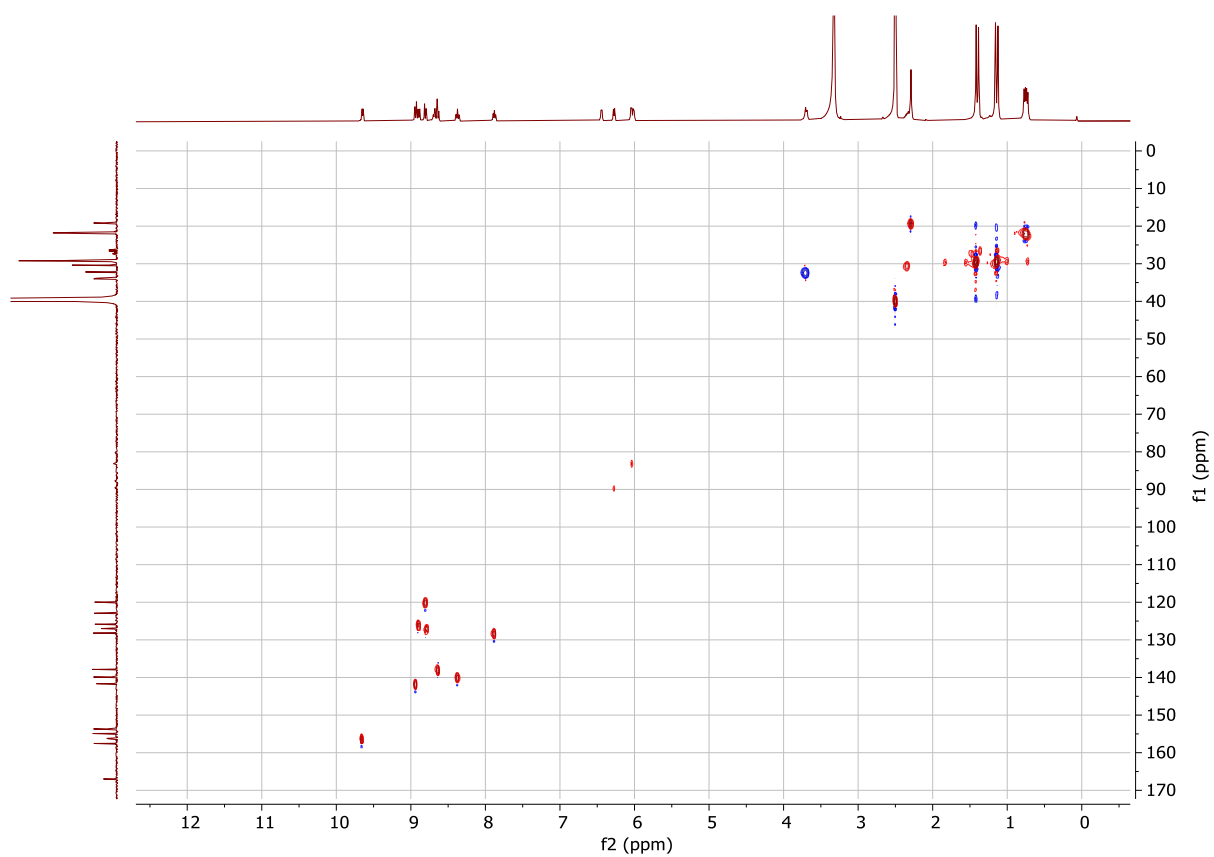

Figure S33.  $^1\text{H}$ - $^{13}\text{C}$  HSQC NMR spectrum of  $[\text{RuCuCl}_3(\text{cymene})(\text{PNNN})]$  (**3**) (201, 800 MHz,  $(\text{CD}_3)_2\text{SO}$ , 298 K).

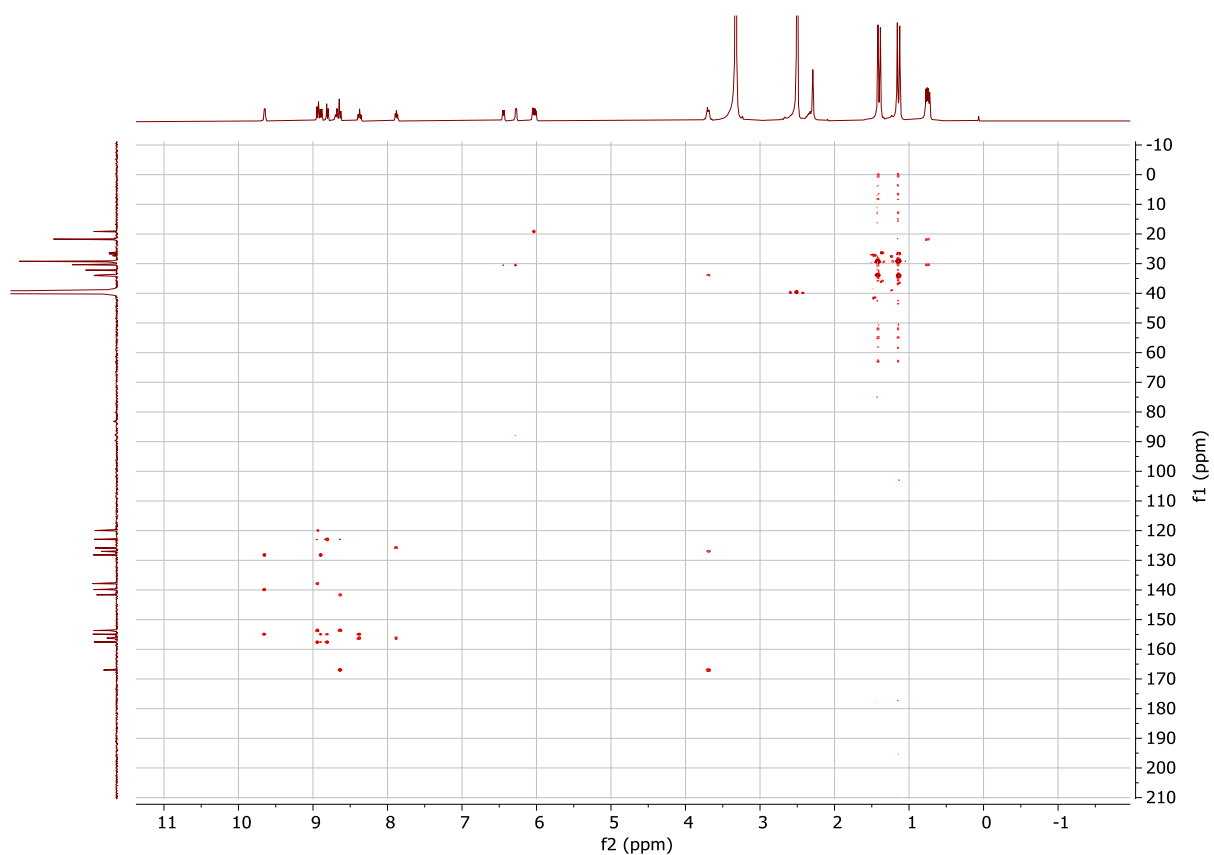

Figure S34.  $^1\text{H}$ - $^{13}\text{C}$  HMBC NMR spectrum of  $[\text{RuCuCl}_3(\text{cymene})(\text{PNNN})]$  (**3**) (201, 800 MHz,  $(\text{CD}_3)_2\text{SO}$ , 298 K).

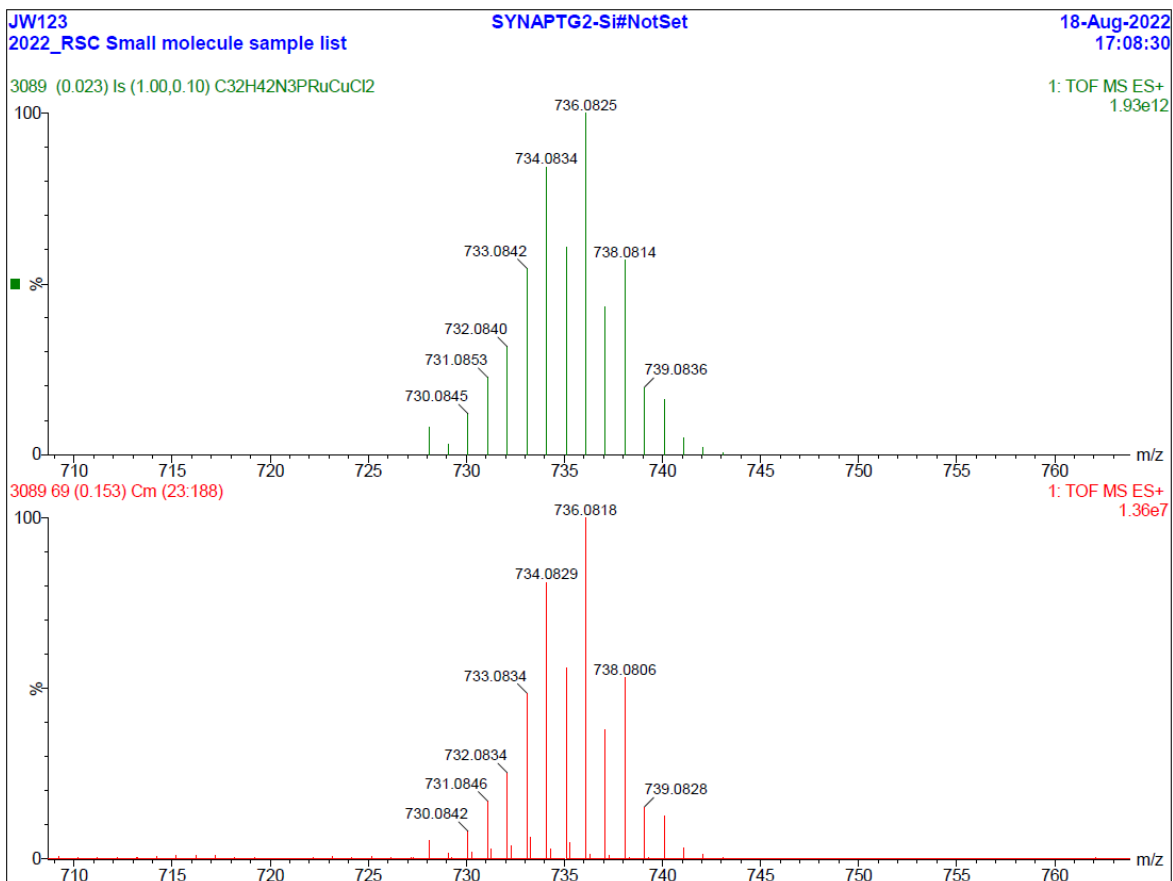

Figure S35. Experimental (bottom) and simulated (top) high resolution mass spectra (ESI+) of  $[\text{RuCuCl}_3(\text{cymene})(\text{PNNN})]$  (**3**).

## 6. Characterisation data for [RuCuCl<sub>2</sub>(cymene)(PNNN)]<sub>2</sub>[PF<sub>6</sub>]<sub>2</sub> ([4]<sub>2</sub>[PF<sub>6</sub>]<sub>2</sub>)

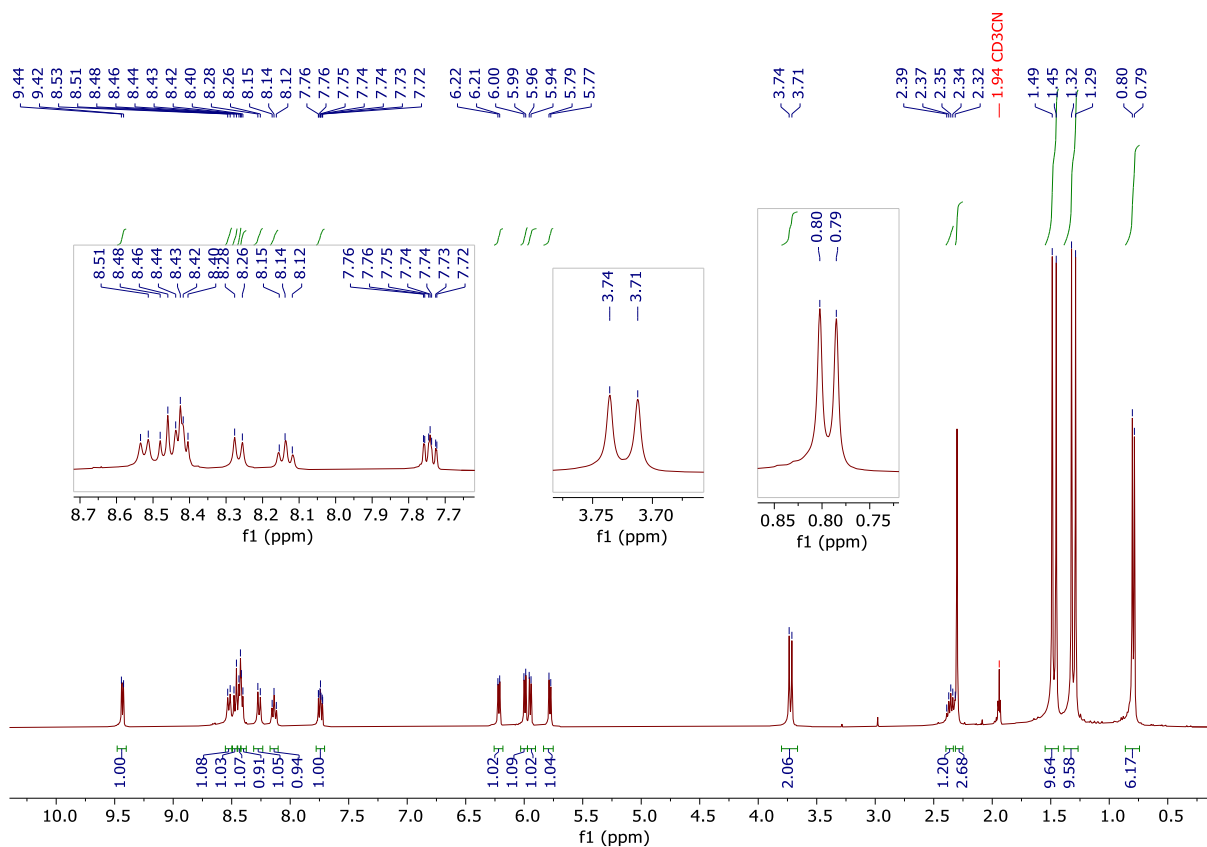

Figure S36. <sup>1</sup>H NMR spectrum of [RuCuCl<sub>2</sub>(cymene)(PNNN)]<sub>2</sub>[PF<sub>6</sub>]<sub>2</sub> ([4]<sub>2</sub>[PF<sub>6</sub>]<sub>2</sub>) (400 MHz, CD<sub>3</sub>CN, 298 K).

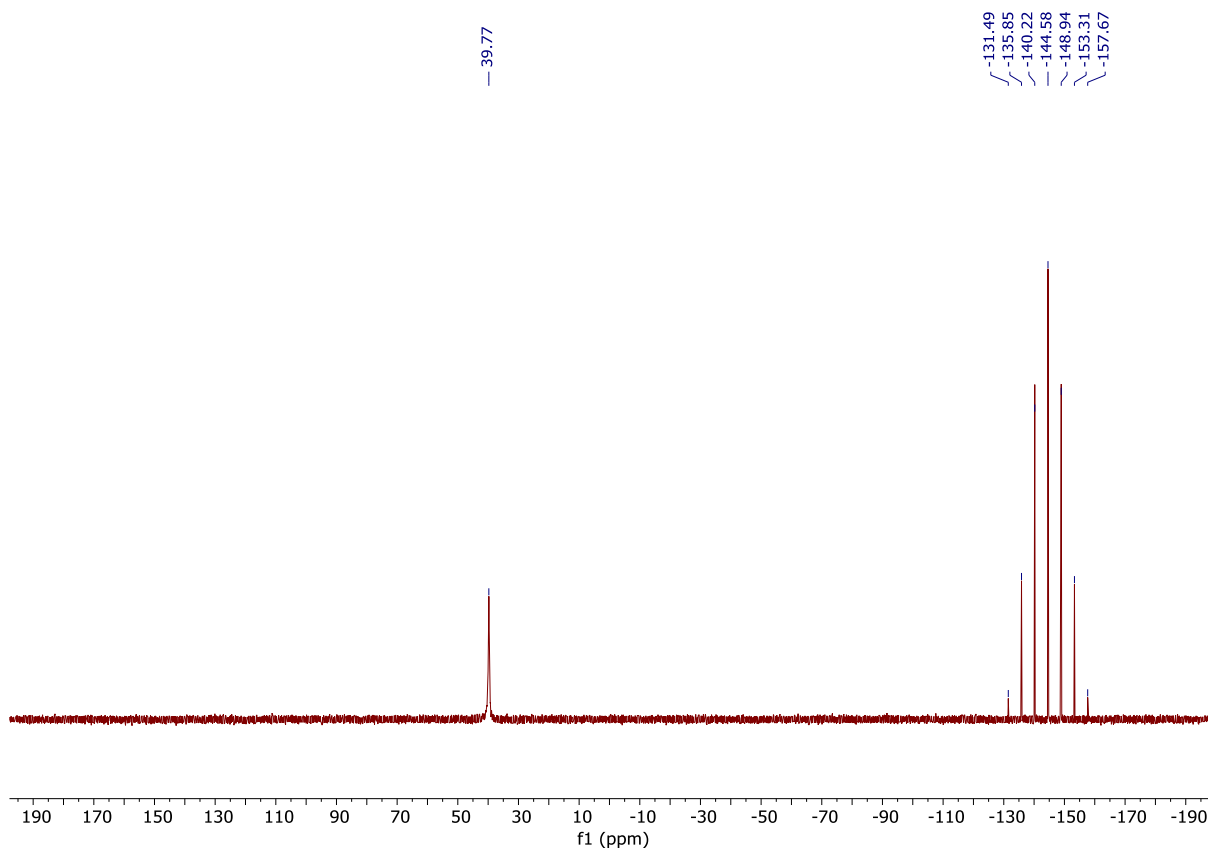

Figure S37. <sup>31</sup>P{<sup>1</sup>H} NMR spectrum of [RuCuCl<sub>2</sub>(cymene)(PNNN)]<sub>2</sub>[PF<sub>6</sub>]<sub>2</sub> ([4]<sub>2</sub>[PF<sub>6</sub>]<sub>2</sub>) (162 MHz, CD<sub>3</sub>CN, 298 K).

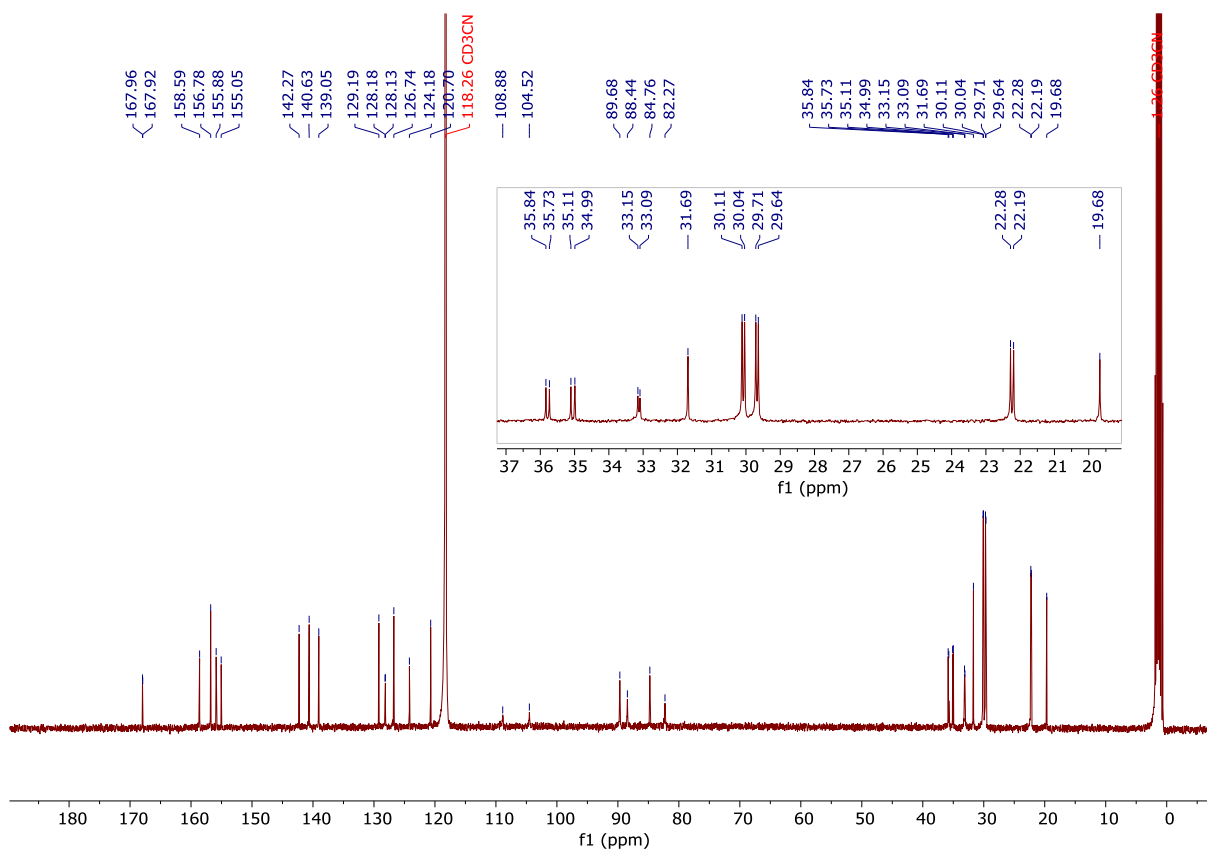

Figure S38. <sup>13</sup>C{<sup>1</sup>H} NMR spectrum of [RuCuCl<sub>2</sub>(cymene)(PNNN)]<sub>2</sub>[PF<sub>6</sub>]<sub>2</sub> ([4]<sub>2</sub>[PF<sub>6</sub>]<sub>2</sub>) (101 MHz, CD<sub>3</sub>CN, 298 K).

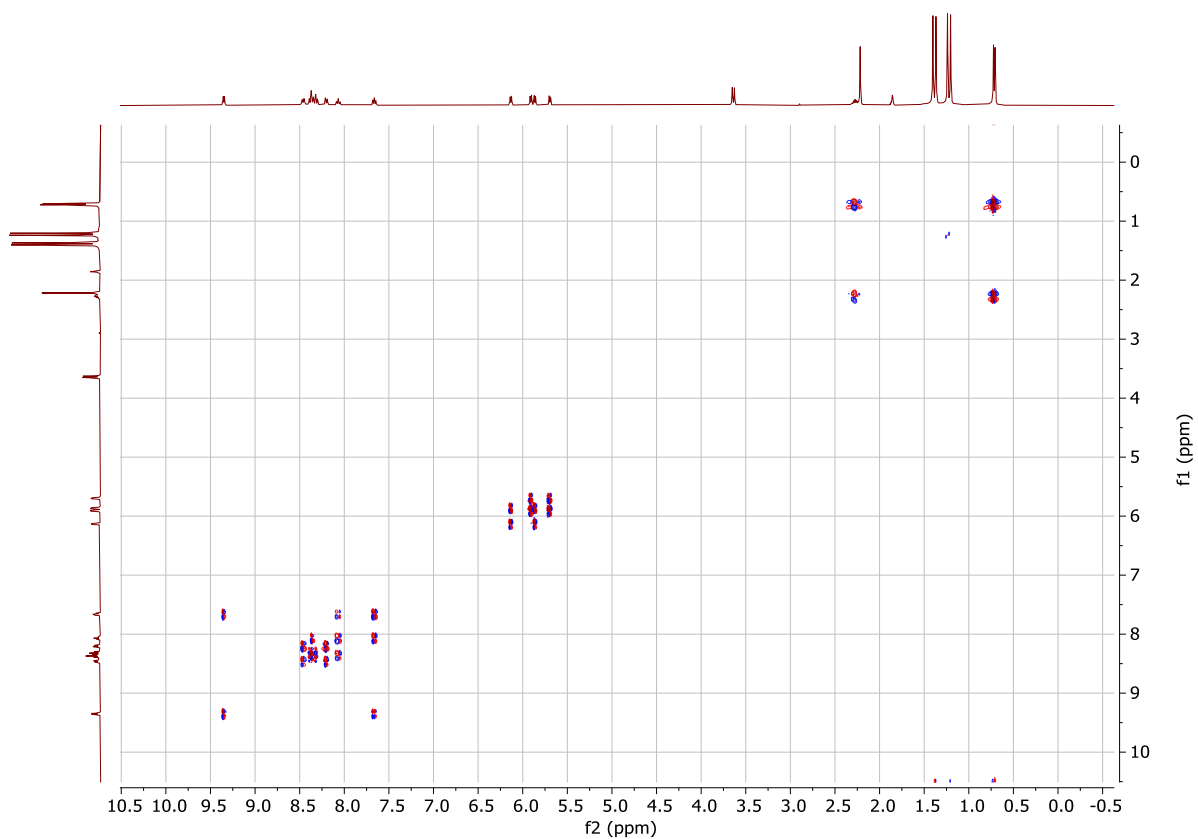

Figure S39. <sup>1</sup>H-<sup>1</sup>H COSY NMR spectrum of [RuCuCl<sub>2</sub>(cymene)(PNNN)]<sub>2</sub>[PF<sub>6</sub>]<sub>2</sub> ([4]<sub>2</sub>[PF<sub>6</sub>]<sub>2</sub>) (400 MHz, CD<sub>3</sub>CN, 298 K).

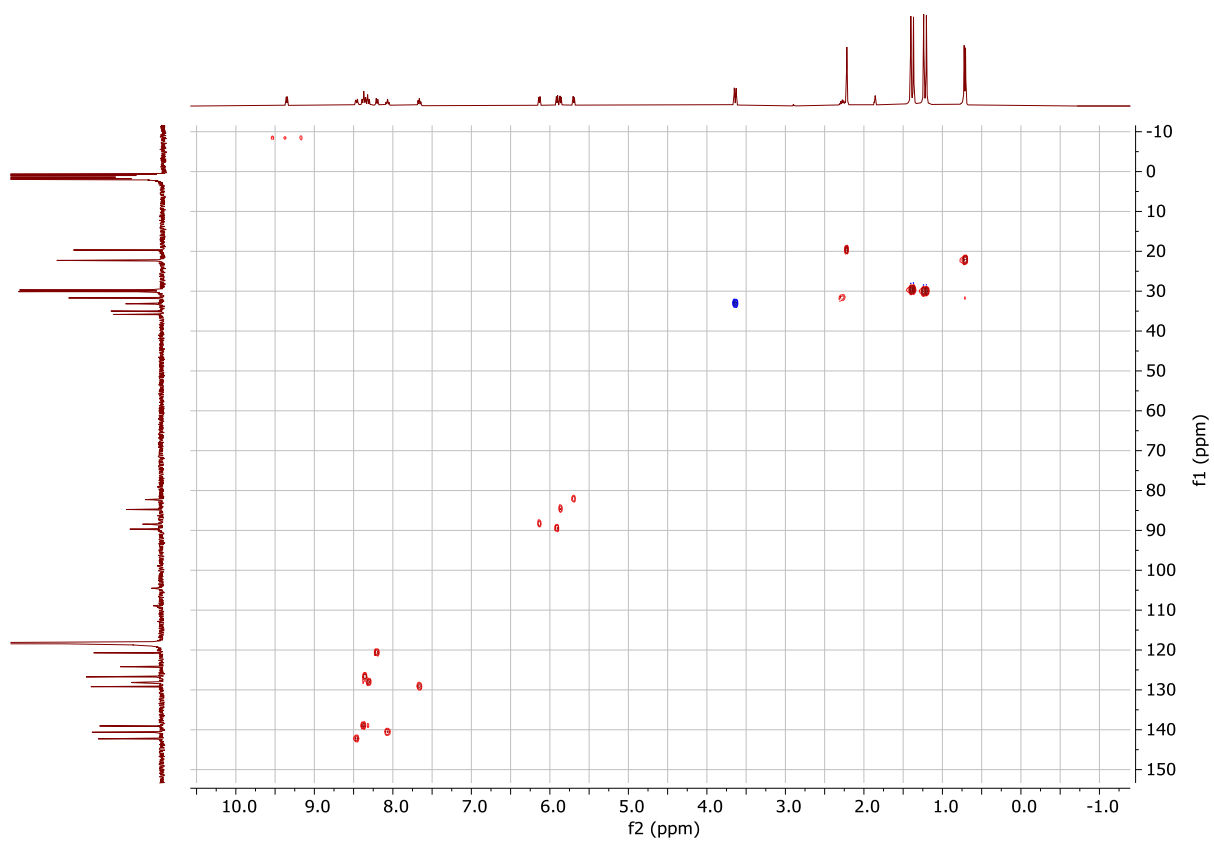

Figure S40.  $^1\text{H}$ - $^{13}\text{C}$  HSQC NMR spectrum of  $[\text{RuCuCl}_2(\text{cymene})(\text{PNNN})]_2[\text{PF}_6]_2$  ( $[\mathbf{4}]_2[\text{PF}_6]_2$ ) (101, 400 MHz,  $\text{CD}_3\text{CN}$ , 298 K).

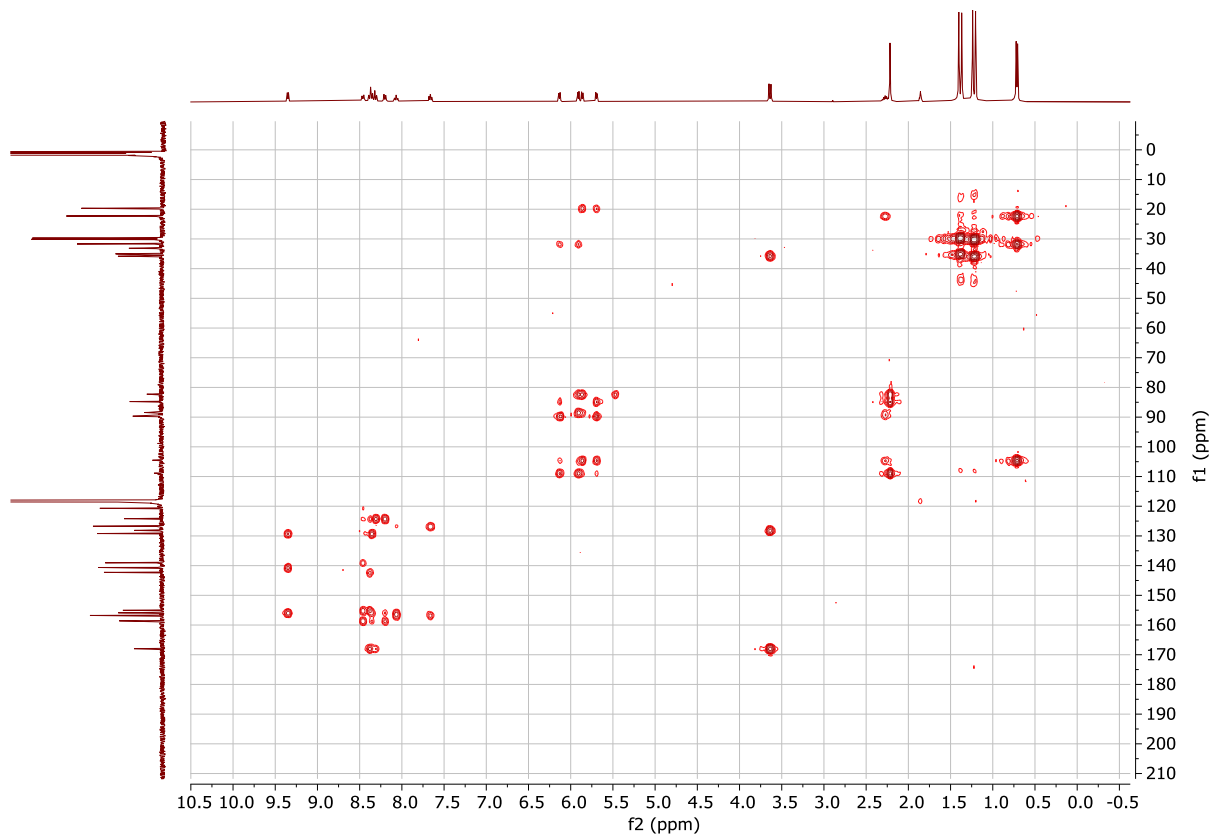

Figure S41.  $^1\text{H}$ - $^{13}\text{C}$  HMBC NMR spectrum of  $[\text{RuCuCl}_2(\text{cymene})(\text{PNNN})]_2[\text{PF}_6]_2$  ( $[\mathbf{4}]_2[\text{PF}_6]_2$ ) (101, 400 MHz,  $\text{CD}_3\text{CN}$ , 298 K).

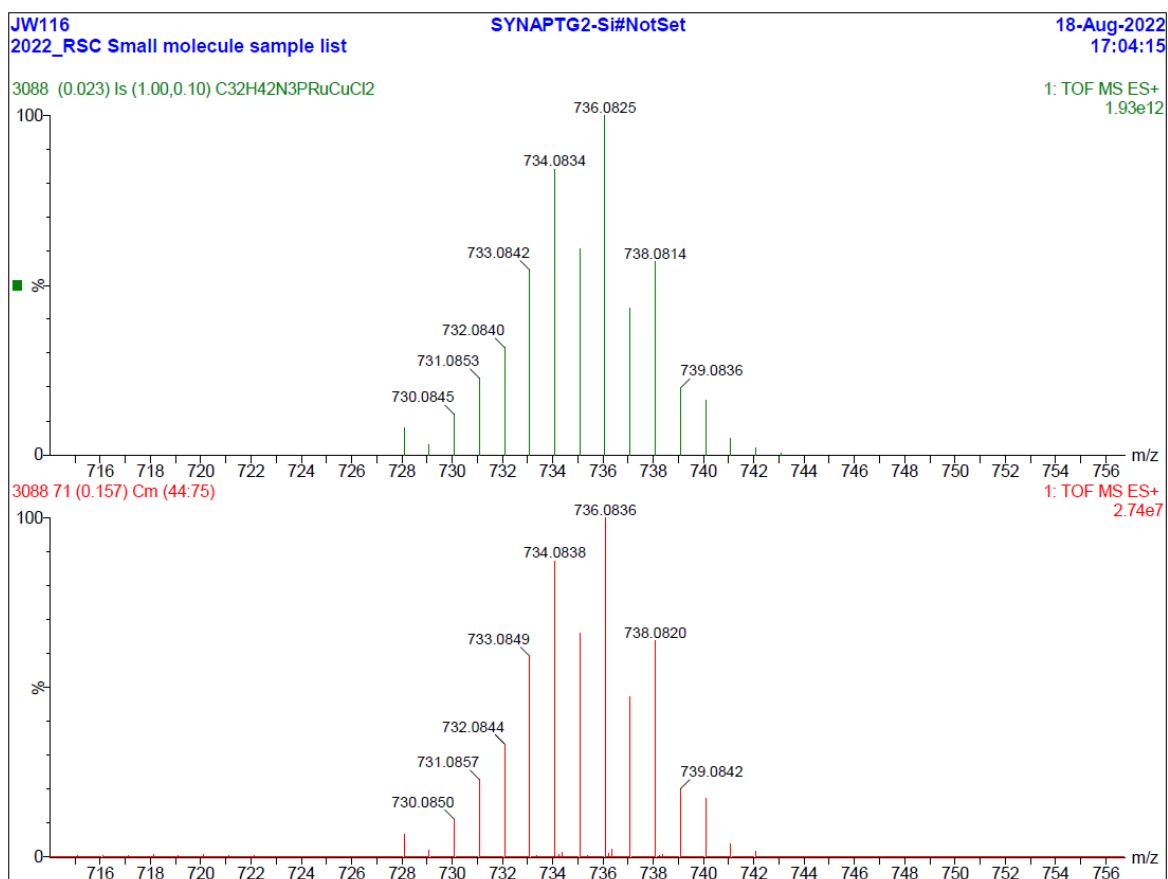

Figure S42. Experimental (bottom) and simulated (top) high resolution mass spectra (ESI+) of  $[\text{RuCuCl}_2(\text{cymene})(\text{PNNN})]_2[\text{PF}_6]_2$  (**[4]<sub>2</sub>[PF<sub>6</sub>]<sub>2</sub>**).



## 7. Characterisation data for $[\text{Cu}_2(\text{O}^t\text{Bu})(\text{PNNN}^*)]$ (5)

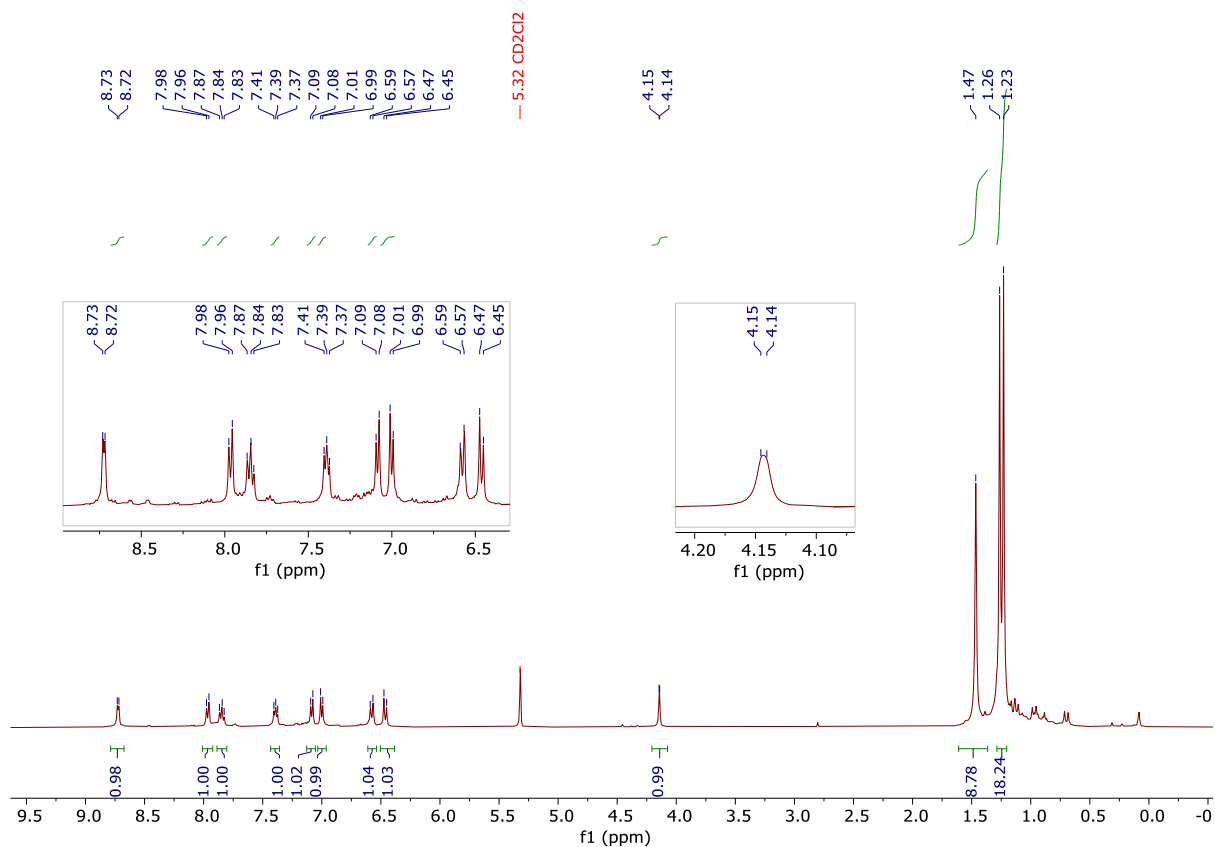

Figure S43.  $^1\text{H}$  NMR spectrum of  $[\text{Cu}_2(\text{O}^t\text{Bu})(\text{PNNN}^*)]$  (5) (400 MHz,  $\text{CD}_2\text{Cl}_2$ , 298 K).

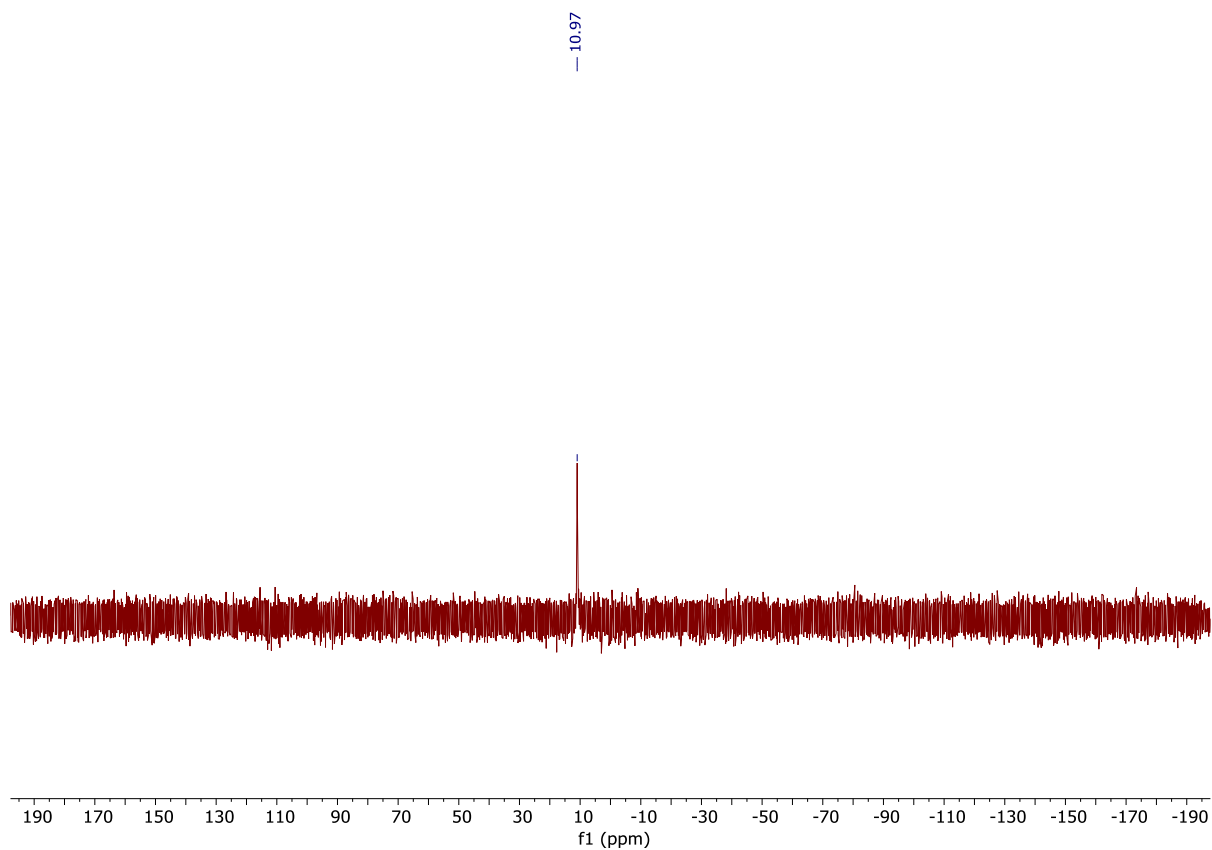

Figure S44.  $^{31}\text{P}\{^1\text{H}\}$  NMR spectrum of  $[\text{Cu}_2(\text{O}^t\text{Bu})(\text{PNNN}^*)]$  (5) (162 MHz,  $\text{CD}_2\text{Cl}_2$ , 298 K).

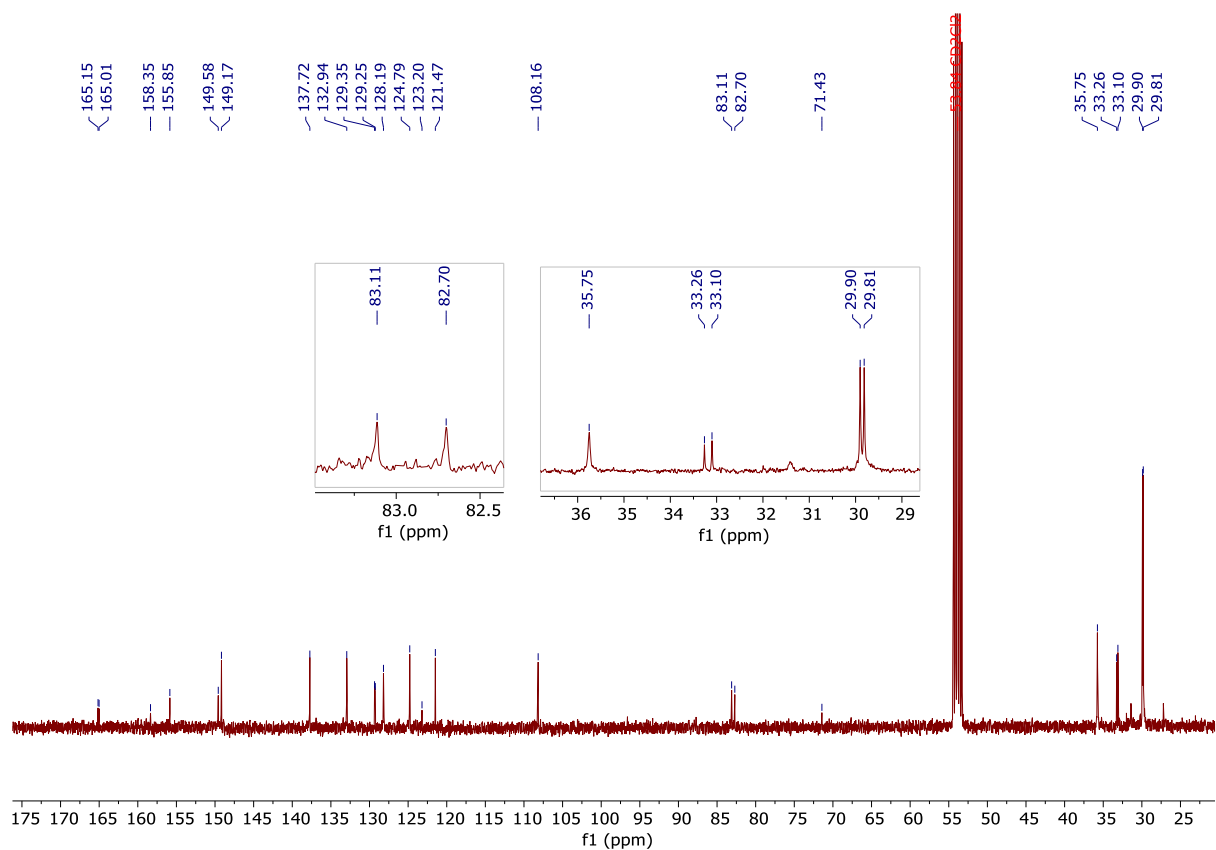

Figure S45.  $^{13}\text{C}\{^1\text{H}\}$  NMR spectrum of  $[\text{Cu}_2(\text{O}^t\text{Bu})(\text{PNNN}^*)]$  (5) (101 MHz,  $\text{CD}_2\text{Cl}_2$ , 298 K).

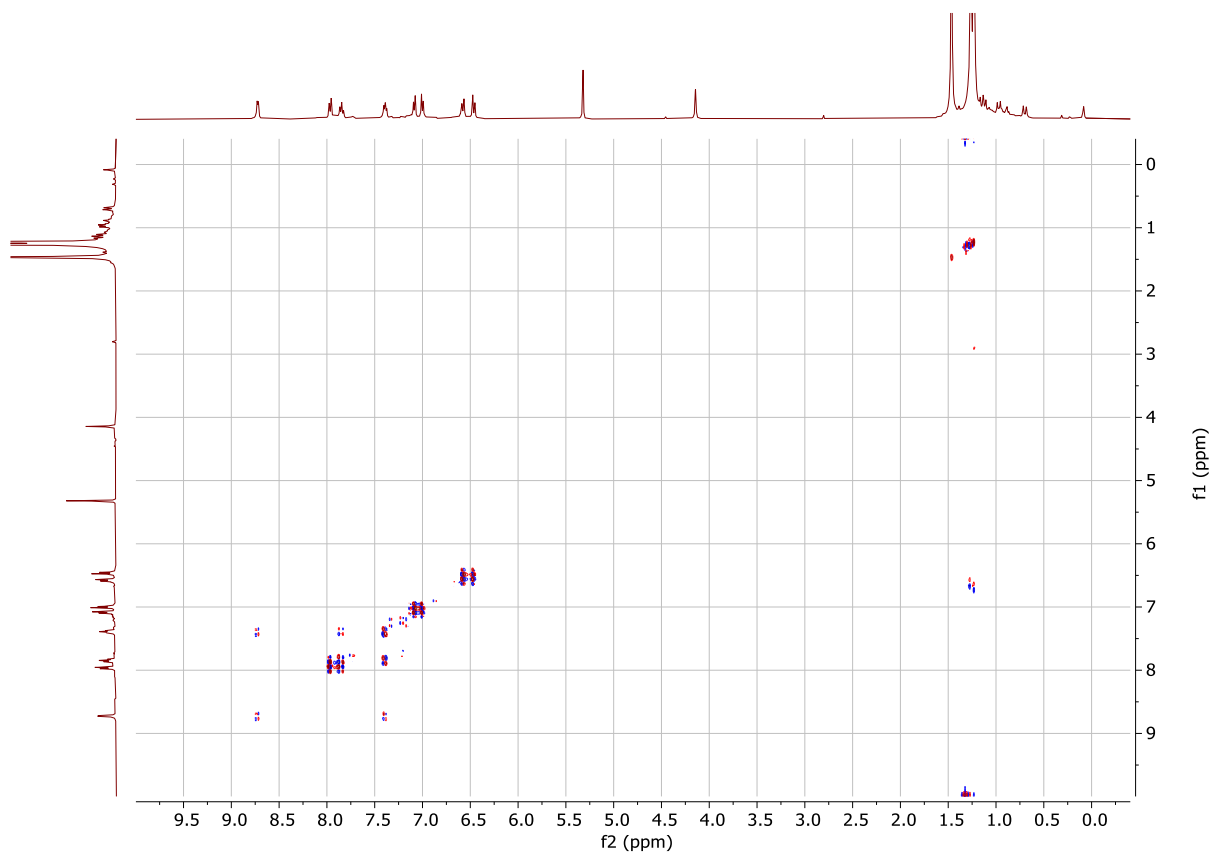

Figure S46.  $^1\text{H}-^1\text{H}$  COSY NMR spectrum of  $[\text{Cu}_2(\text{O}^t\text{Bu})(\text{PNNN}^*)]$  (5) (400 MHz,  $\text{CD}_2\text{Cl}_2$ , 298 K).

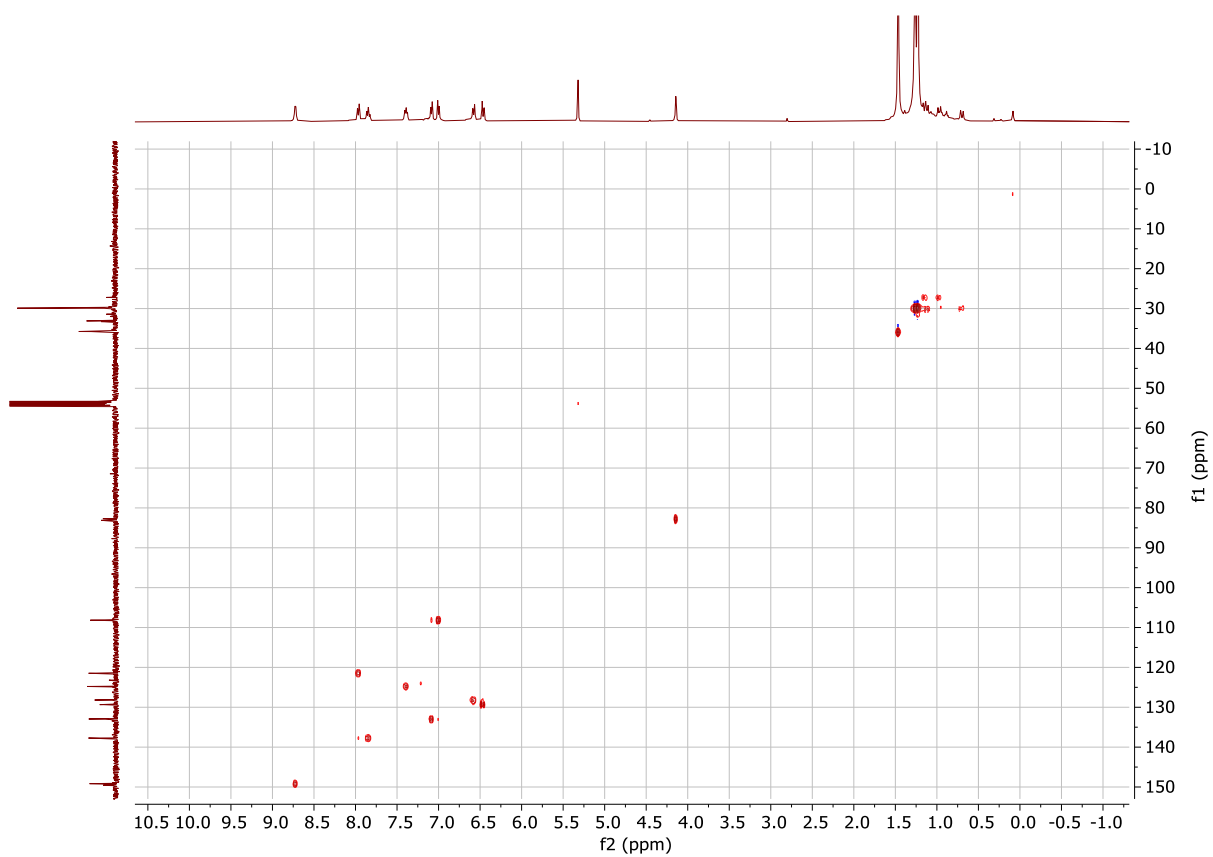

Figure S47.  $^1\text{H}$ - $^{13}\text{C}$  HSQC NMR spectrum of  $[\text{Cu}_2(\text{O}^t\text{Bu})(\text{PNNN}^*)]$  (**5**) (101, 400 MHz,  $\text{CD}_2\text{Cl}_2$ , 298 K).

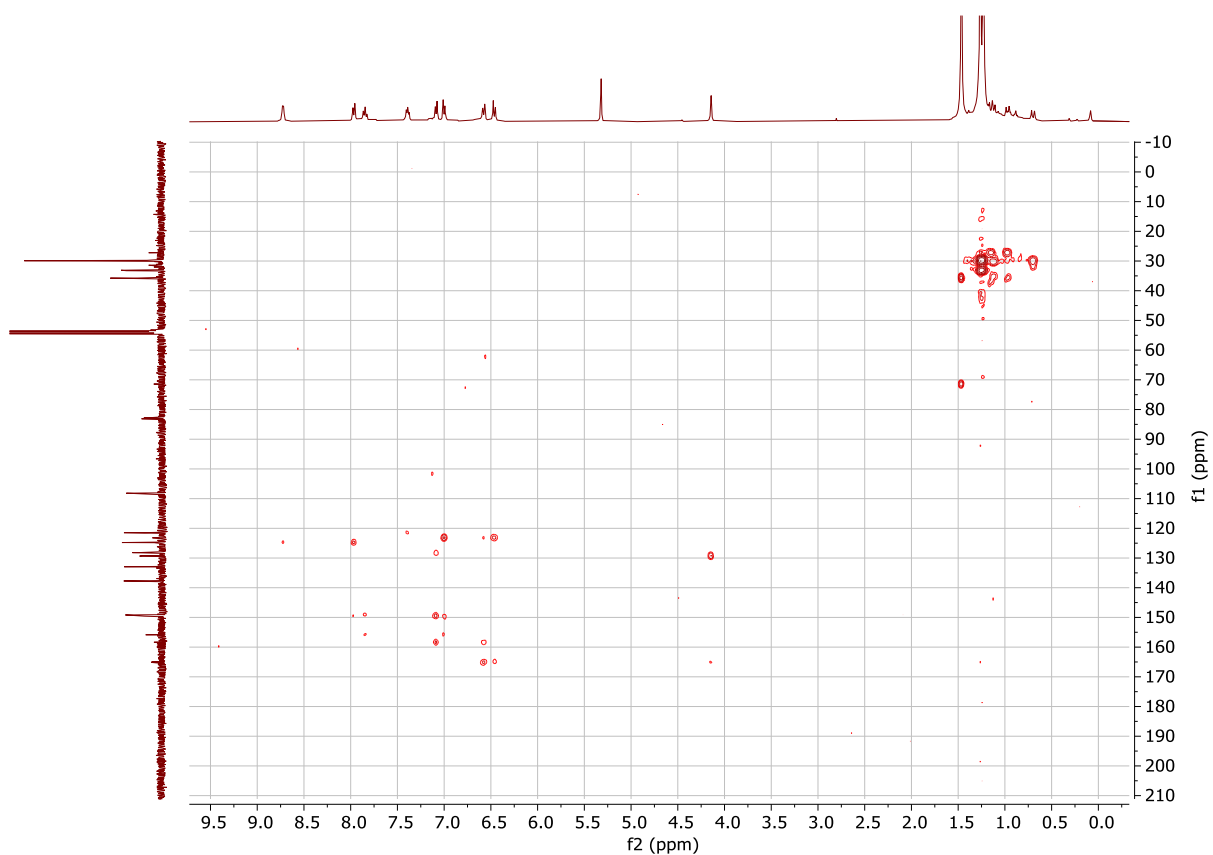

Figure S48.  $^1\text{H}$ - $^{13}\text{C}$  HMBC NMR spectrum of  $[\text{Cu}_2(\text{O}^t\text{Bu})(\text{PNNN}^*)]$  (**5**) (101, 400 MHz,  $\text{CD}_2\text{Cl}_2$ , 298 K).

## 8. Characterisation data for [RuCuCl(cymene)(PNNN\*)]PF<sub>6</sub> ([6]PF<sub>6</sub>)

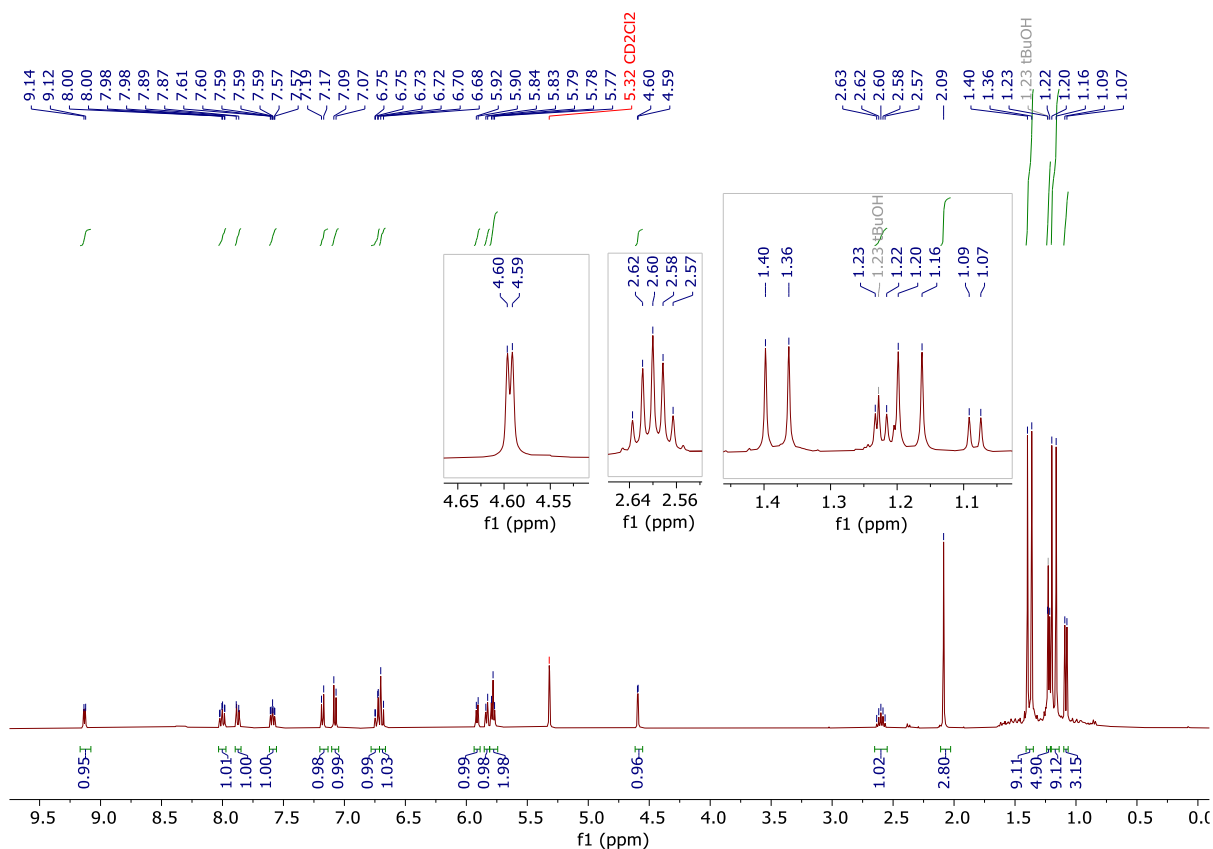

Figure S49. <sup>1</sup>H NMR spectrum of [RuCuCl(cymene)(PNNN\*)]PF<sub>6</sub> ([6]PF<sub>6</sub>) (400 MHz, CD<sub>2</sub>Cl<sub>2</sub>, 298 K).

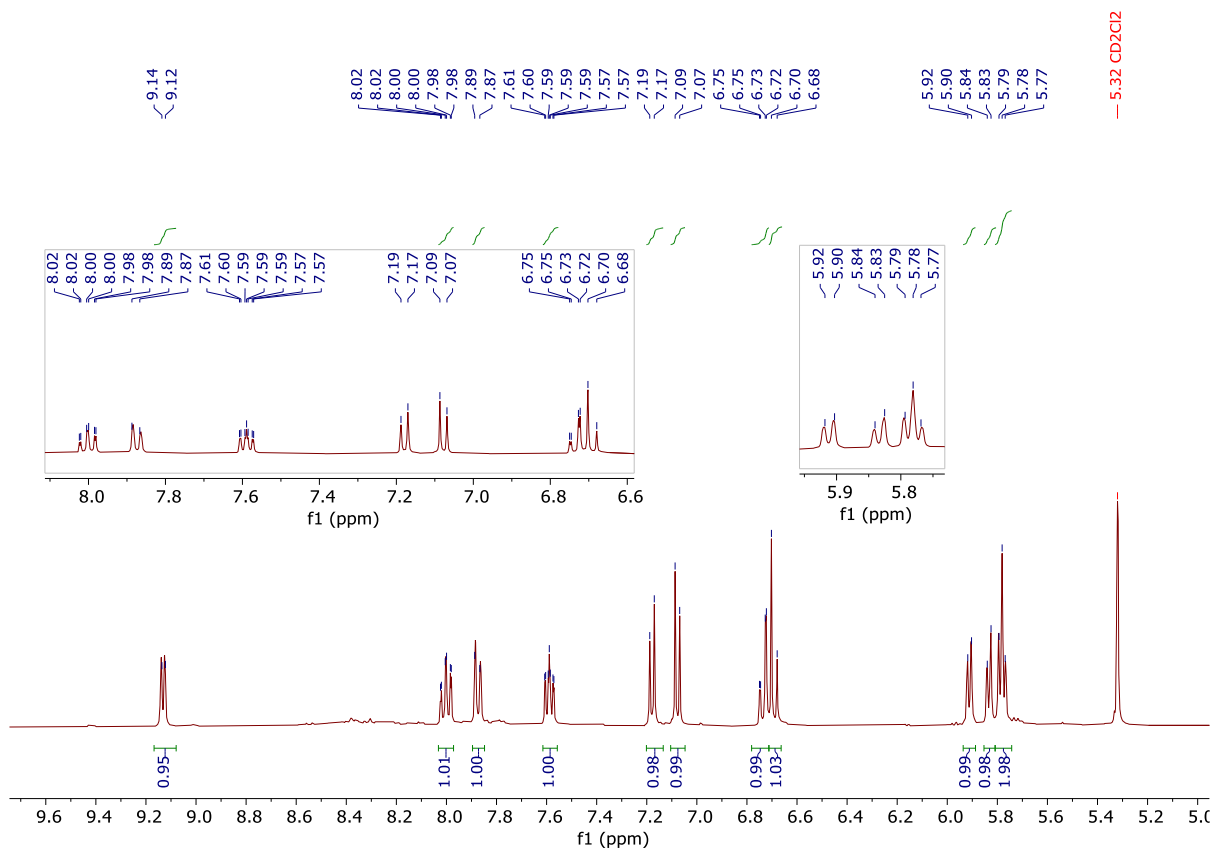

Figure S50. Aromatic region of the <sup>1</sup>H NMR spectrum of [RuCuCl(cymene)(PNNN\*)]PF<sub>6</sub> ([6]PF<sub>6</sub>) (400 MHz, CD<sub>2</sub>Cl<sub>2</sub>, 298 K).

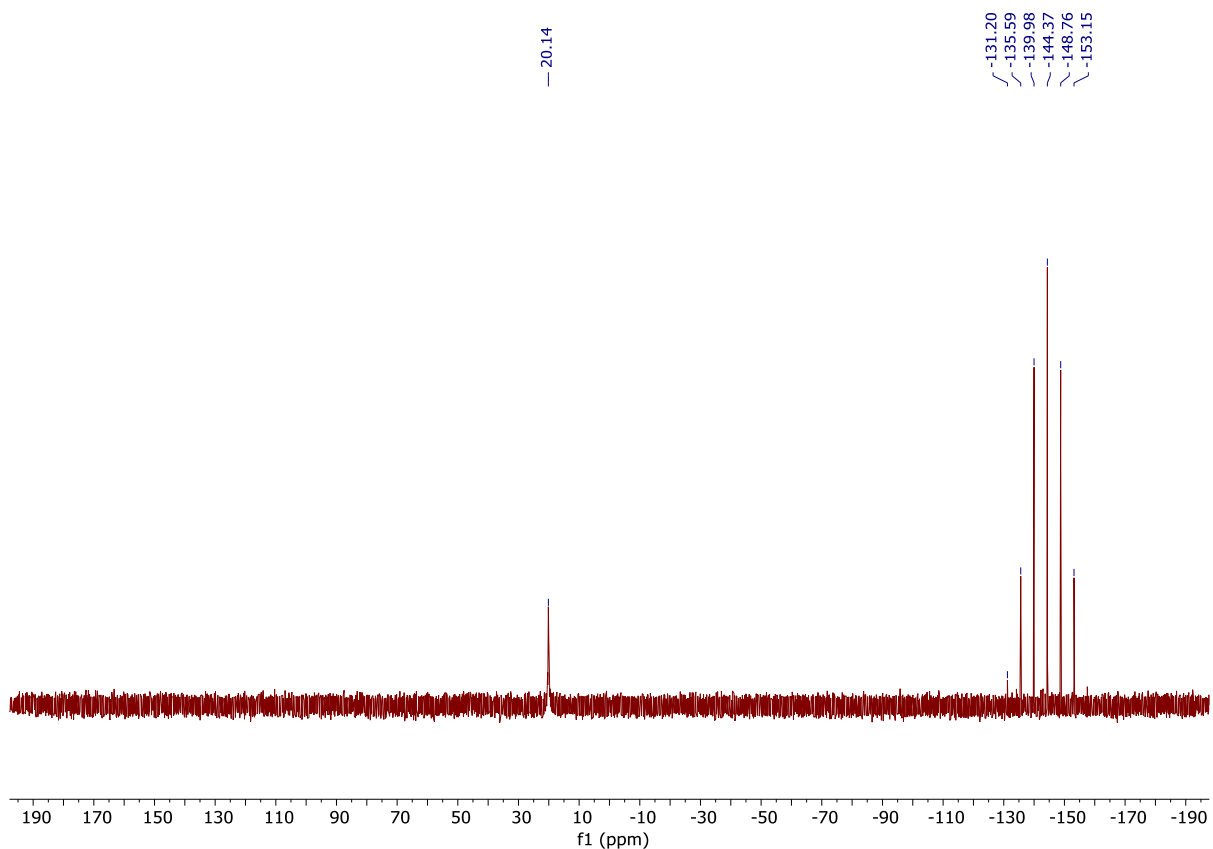

Figure S51.  $^{31}\text{P}\{^1\text{H}\}$  NMR spectrum of  $[\text{RuCuCl}(\text{cymene})(\text{PNNN}^*)]\text{PF}_6$  (**[6]PF<sub>6</sub>**) (162 MHz,  $\text{CD}_2\text{Cl}_2$ , 298 K).

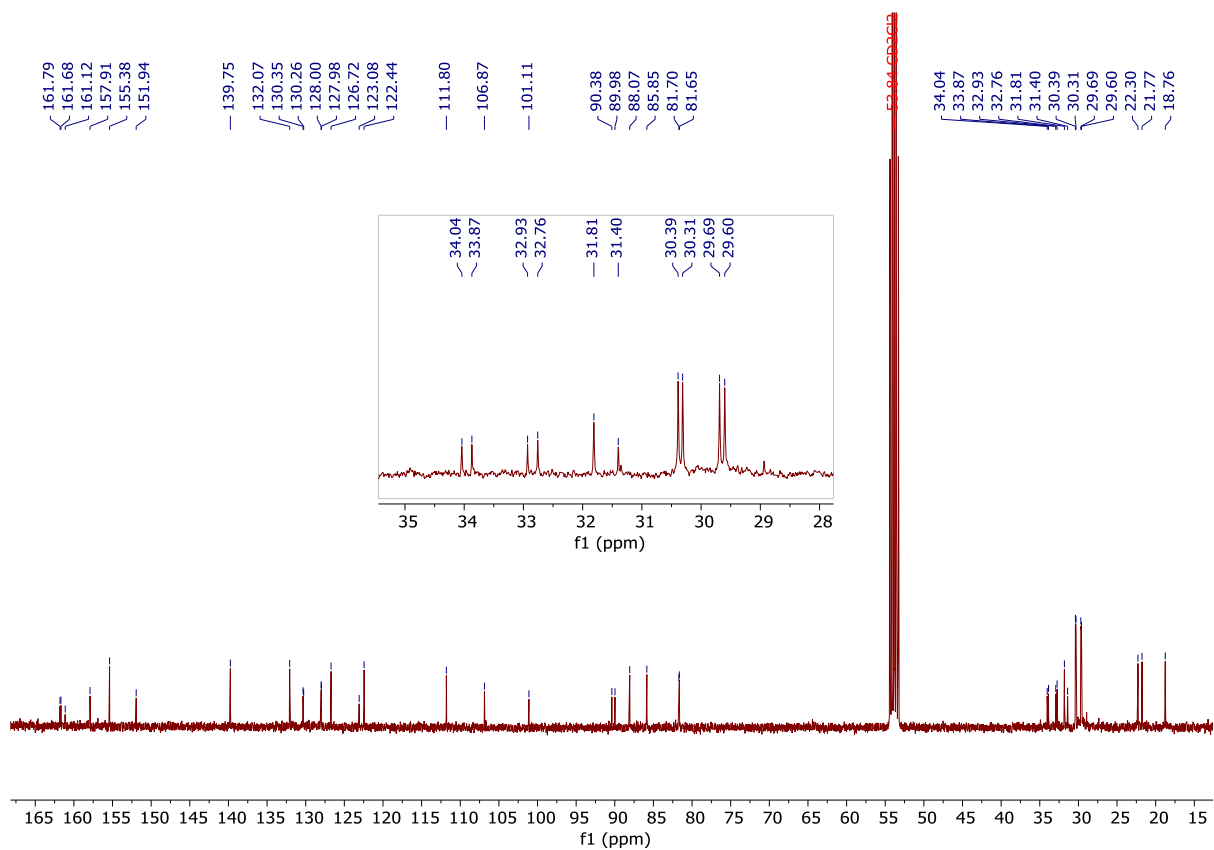

Figure S52.  $^{13}\text{C}\{^1\text{H}\}$  NMR spectrum of  $[\text{RuCuCl}(\text{cymene})(\text{PNNN}^*)]\text{PF}_6$  (**[6]PF<sub>6</sub>**) (101 MHz,  $\text{CD}_2\text{Cl}_2$ , 298 K).

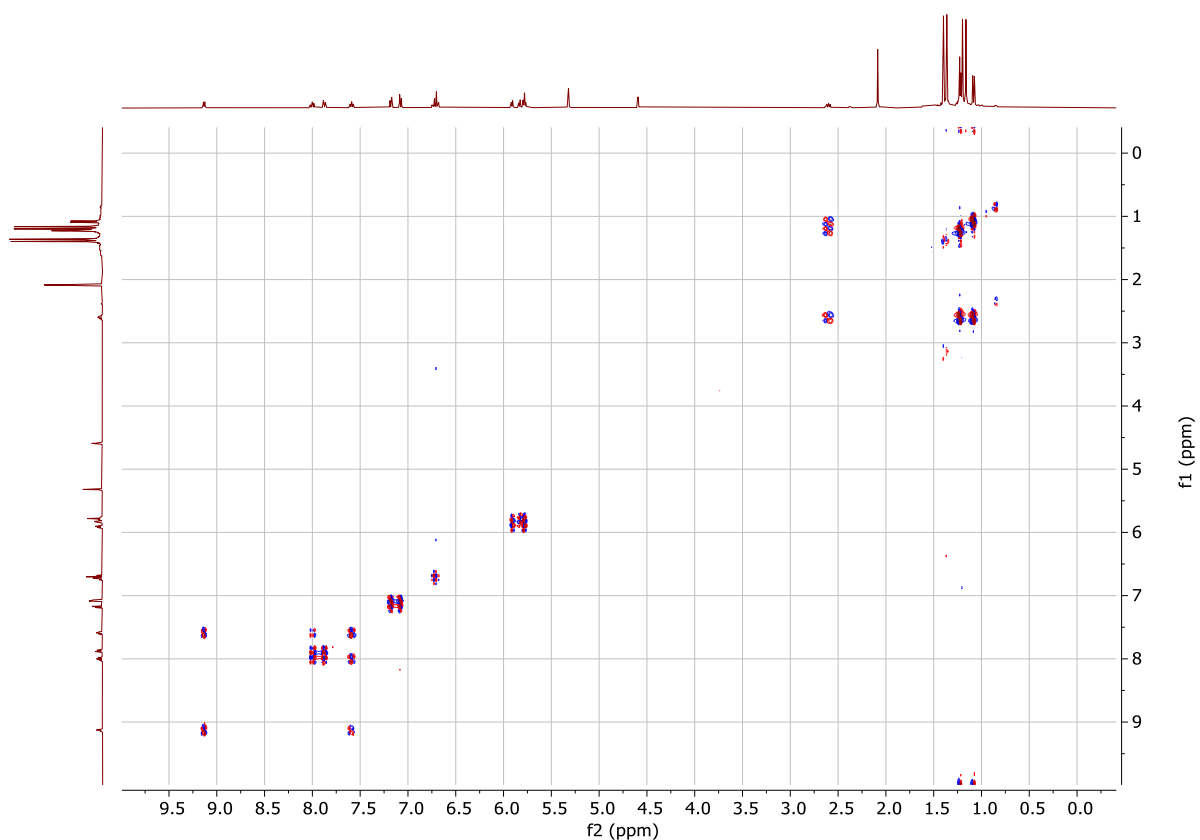

Figure S53.  $^1\text{H}$ - $^1\text{H}$  COSY NMR spectrum of  $[\text{RuCuCl}(\text{cymene})(\text{PNNN}^*)]\text{PF}_6$  (**[6]PF<sub>6</sub>**) (400 MHz,  $\text{CD}_2\text{Cl}_2$ , 298 K).

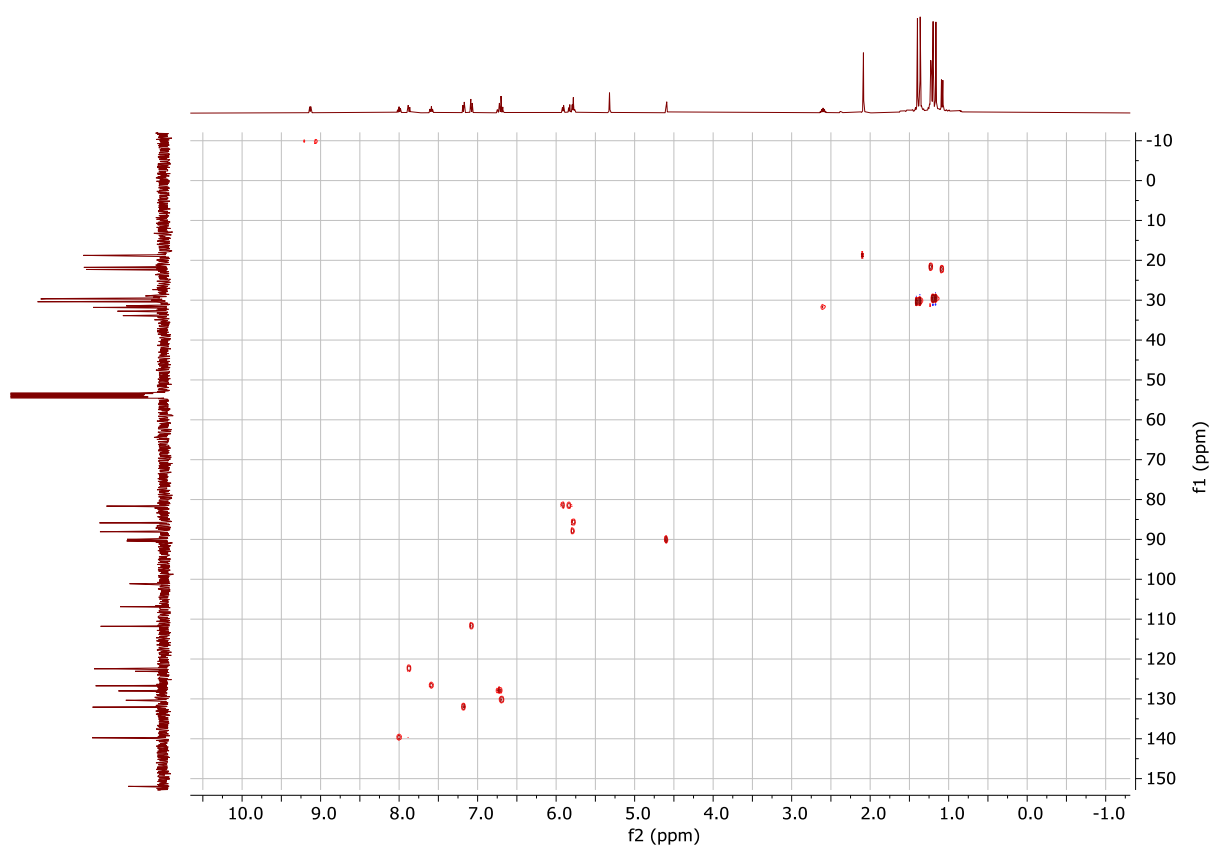

Figure S54.  $^1\text{H}$ - $^{13}\text{C}$  HSQC NMR spectrum of  $[\text{RuCuCl}(\text{cymene})(\text{PNNN}^*)]\text{PF}_6$  (**[6]PF<sub>6</sub>**) (101, 400 MHz,  $\text{CD}_2\text{Cl}_2$ , 298 K).

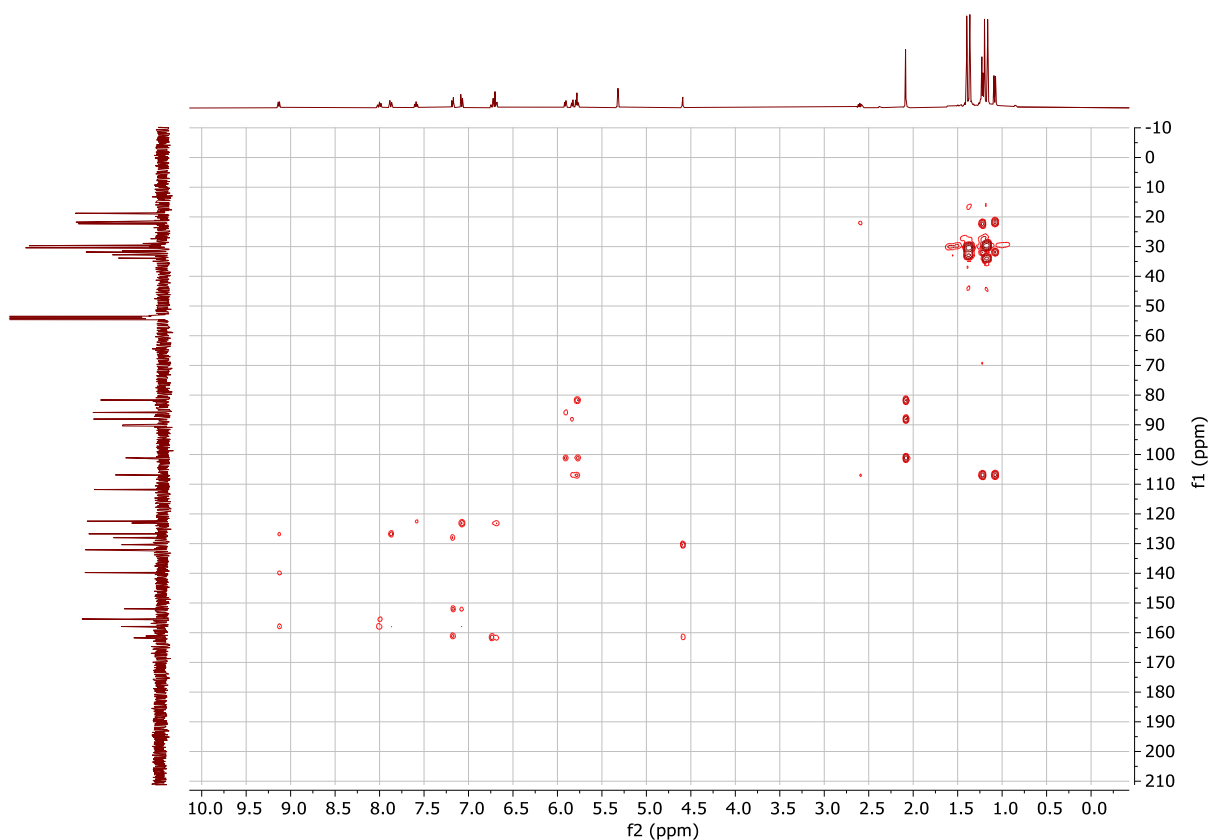

Figure S55.  $^1\text{H}$ - $^{13}\text{C}$  HMBC NMR spectrum of  $[\text{RuCuCl}(\text{cymene})(\text{PNNN}^*)]\text{PF}_6$  (**[6]PF<sub>6</sub>**) (101, 400 MHz,  $\text{CD}_2\text{Cl}_2$ , 298 K).

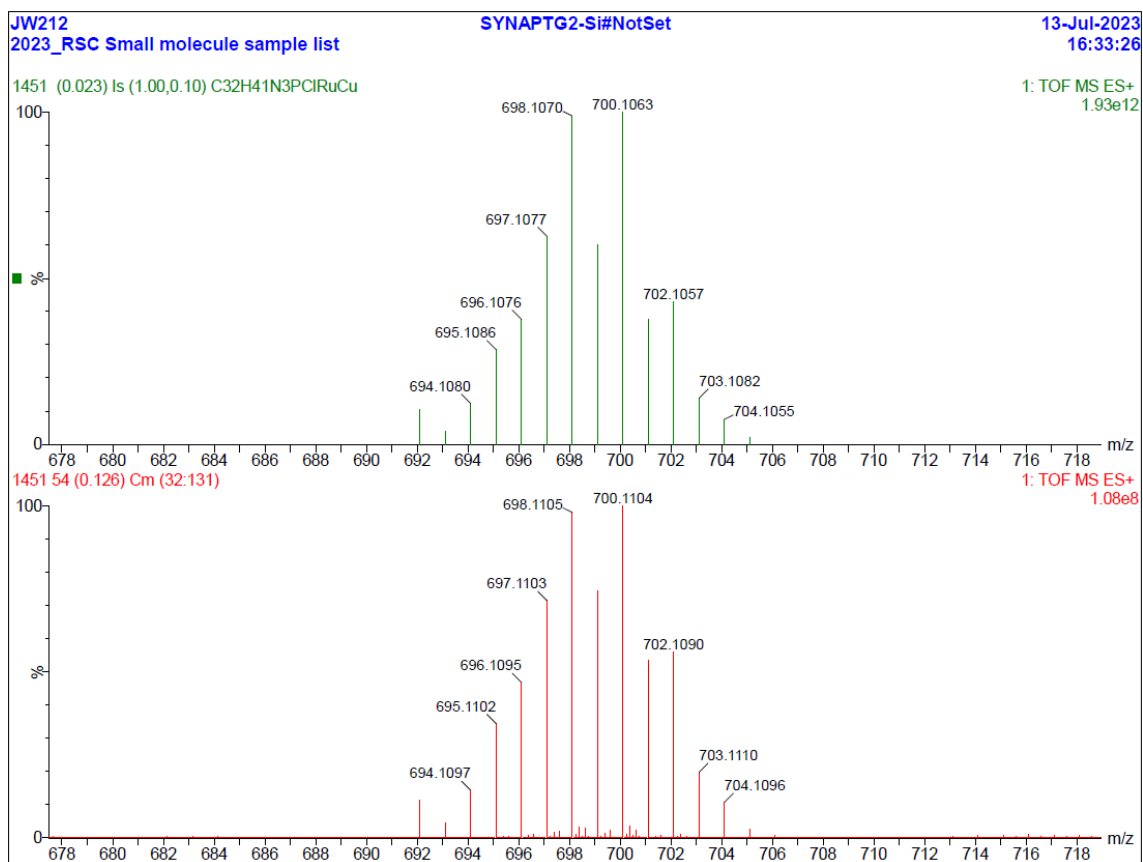

Figure S56. Experimental (bottom) and simulated (top) high resolution mass spectra (ESI+) of  $[\text{RuCuCl}(\text{cymene})(\text{PNNN}^*)]\text{PF}_6$  (**[6]PF<sub>6</sub>**).

## 9. X-ray crystallographic data

Table S1. X-ray crystallographic data for reported compounds.

| Compound                                    | (PNNN) <sub>2</sub> ·<br>CHCl <sub>3</sub>                                | [Cu <sub>2</sub> Cl <sub>2</sub> (PNNN)]·<br>CH <sub>2</sub> Cl <sub>2</sub><br>(1·CH <sub>2</sub> Cl <sub>2</sub> ) | [RuCl(cymene)(PNNN)]<br>Cl ( <b>[2]Cl</b> )                        | [RuCuCl <sub>3</sub> (cymene)(PNNN)]<br>·(MeCN) <sub>2</sub> ( <b>3</b> ·(MeCN) <sub>2</sub> )              | [RuCuCl <sub>2</sub> (cymene)(PNNN)] <sub>2</sub><br>[PF <sub>6</sub> ] <sub>1.655</sub> [CuCl <sub>2</sub> ] <sub>0.345</sub> ·(MeCN) <sub>2</sub><br><b>([4]<sub>2</sub>[PF<sub>6</sub>]<sub>1.655</sub>[CuCl<sub>2</sub>]<sub>0.345</sub>·<br/>(MeCN)<sub>2</sub>)</b> | [Cu <sub>2</sub> (OtBu)(PNNN*)]<br>( <b>5</b> )                   | [RuCuCl(cymene)(PNNN*)]<br>PF <sub>6</sub> ( <b>[6]PF<sub>6</sub></b> )  |
|---------------------------------------------|---------------------------------------------------------------------------|----------------------------------------------------------------------------------------------------------------------|--------------------------------------------------------------------|-------------------------------------------------------------------------------------------------------------|---------------------------------------------------------------------------------------------------------------------------------------------------------------------------------------------------------------------------------------------------------------------------|-------------------------------------------------------------------|--------------------------------------------------------------------------|
| CCDC number                                 | 2386871                                                                   | 2386871                                                                                                              | 2386872                                                            | 2386873                                                                                                     | 2386874                                                                                                                                                                                                                                                                   | 2386875                                                           | 2386876                                                                  |
| Chemical formula                            | 2(C <sub>22</sub> H <sub>28</sub> N <sub>3</sub> P),<br>CHCl <sub>3</sub> | C <sub>22</sub> H <sub>28</sub> Cl <sub>2</sub> Cu <sub>2</sub> N <sub>3</sub> P<br>CH <sub>2</sub> Cl <sub>2</sub>  | C <sub>32</sub> H <sub>43</sub> Cl <sub>2</sub> N <sub>3</sub> PRu | C <sub>32</sub> H <sub>42</sub> Cl <sub>3</sub> CuN <sub>3</sub> PRu,<br>2(C <sub>2</sub> H <sub>3</sub> N) | C <sub>64</sub> H <sub>84</sub> Cl <sub>4</sub> Cu <sub>2</sub> N <sub>6</sub> P <sub>2</sub> Ru <sub>2</sub> ,<br>1.655(F <sub>6</sub> P), 0.345(Cl <sub>2</sub> Cu),<br>2(C <sub>2</sub> H <sub>3</sub> N)                                                              | C <sub>26</sub> H <sub>36</sub> Cu <sub>2</sub> N <sub>3</sub> OP | C <sub>32</sub> H <sub>41</sub> ClCuN <sub>3</sub> PRu, F <sub>6</sub> P |
| Formula weight                              | 850.25                                                                    | 648.35                                                                                                               | 636.1854                                                           | 736.0825                                                                                                    | 1838.77                                                                                                                                                                                                                                                                   | 564.63                                                            | 843.68                                                                   |
| Temperature/K                               | 150.00(10)                                                                | 150.00(10)                                                                                                           | 150.00(10)                                                         | 150.00(10)                                                                                                  | 150.00(10)                                                                                                                                                                                                                                                                | 150.00(10)                                                        | 100(2)                                                                   |
| Crystal system                              | Monoclinic                                                                | Triclinic                                                                                                            | Tetragonal                                                         | Triclinic                                                                                                   | Triclinic                                                                                                                                                                                                                                                                 | Triclinic                                                         | Triclinic                                                                |
| Space group                                 | <i>P</i> 2 <sub>1</sub>                                                   | <i>P</i> -1                                                                                                          | <i>I</i> 4 <sub>1</sub> / <i>a</i>                                 | <i>P</i> -1                                                                                                 | <i>P</i> -1                                                                                                                                                                                                                                                               | <i>P</i> -1                                                       | <i>P</i> -1                                                              |
| a/Å                                         | 18.4963(2)                                                                | 9.7176(3)                                                                                                            | 32.5802(3)                                                         | 11.0189(2)                                                                                                  | 8.3879(3)                                                                                                                                                                                                                                                                 | 8.2661(3)                                                         | 8.3590(17)                                                               |
| b/Å                                         | 6.17950(10)                                                               | 13.0045(5)                                                                                                           | 32.5802(3)                                                         | 12.5547(2)                                                                                                  | 16.3160(6)                                                                                                                                                                                                                                                                | 11.0365(3)                                                        | 10.554(2)                                                                |
| c/Å                                         | 20.5648(3)                                                                | 13.0393(3)                                                                                                           | 12.6410(3)                                                         | 14.1481(3)                                                                                                  | 16.3624(5)                                                                                                                                                                                                                                                                | 15.4542(4)                                                        | 20.422(4)                                                                |
| α/°                                         | 90                                                                        | 64.567(3)                                                                                                            | 90                                                                 | 87.736(2)                                                                                                   | 113.508(3)                                                                                                                                                                                                                                                                | 96.178(2)                                                         | 100.97(3)                                                                |
| β/°                                         | 107.9800(10)                                                              | 68.136(3)                                                                                                            | 90                                                                 | 83.713(2)                                                                                                   | 100.048(3)                                                                                                                                                                                                                                                                | 98.598(2)                                                         | 97.18(3)                                                                 |
| γ/°                                         | 90                                                                        | 75.453(3)                                                                                                            | 90                                                                 | 77.647(2)                                                                                                   | 96.419(3)                                                                                                                                                                                                                                                                 | 108.172(3)                                                        | 93.89(3)                                                                 |
| Volume/Å <sup>3</sup>                       | 2235.72(6)                                                                | 1372.87(9)                                                                                                           | 13418.0(4)                                                         | 1900.16(6)                                                                                                  | 1980.74(13)                                                                                                                                                                                                                                                               | 1306.52(7)                                                        | 1747.1(6)                                                                |
| Z                                           | 2                                                                         | 2                                                                                                                    | 16                                                                 | 2                                                                                                           | 1                                                                                                                                                                                                                                                                         | 2                                                                 | 2                                                                        |
| Radiation                                   | Cu Kα                                                                     | Cu Kα                                                                                                                | Cu Kα                                                              | Cu Kα                                                                                                       | Cu Kα                                                                                                                                                                                                                                                                     | Cu Kα                                                             | Synchrotron – equivalent to Mo Kα                                        |
| μ/mm <sup>-1</sup>                          | 2.827                                                                     | 6.175                                                                                                                | 5.877                                                              | 1.54184                                                                                                     | 6.451                                                                                                                                                                                                                                                                     | 2.756                                                             | 1.268                                                                    |
| <i>D</i> <sub>calc</sub> /gcm <sup>-3</sup> | 1.263                                                                     | 1.568                                                                                                                | 1.332                                                              | 1.490                                                                                                       | 1.541                                                                                                                                                                                                                                                                     | 1.435                                                             | 1.604                                                                    |
| Reflection measured                         | 15589                                                                     | 14511                                                                                                                | 21093                                                              | 22982                                                                                                       | 14037                                                                                                                                                                                                                                                                     | 7947                                                              | 43947                                                                    |
| Independent reflections                     | 7852                                                                      | 5606                                                                                                                 | 6925                                                               | 7655                                                                                                        | 7822                                                                                                                                                                                                                                                                      | 5072                                                              | 7496                                                                     |
| R <sub>int</sub>                            | 0.0314                                                                    | 0.0402                                                                                                               | 0.0640                                                             | 0.0238                                                                                                      | 0.0228                                                                                                                                                                                                                                                                    | 0.0194                                                            | 0.0607                                                                   |
| Final R <sub>1</sub> values<br>[I > 2σ(I)]  | 0.0358                                                                    | 0.0476                                                                                                               | 0.0457                                                             | 0.0277                                                                                                      | 0.0470                                                                                                                                                                                                                                                                    | 0.0341                                                            | 0.0388                                                                   |
| Final wR <sub>2</sub> values<br>(all data)  | 0.0934                                                                    | 0.1241                                                                                                               | 0.1241                                                             | 0.0697                                                                                                      | 0.1318                                                                                                                                                                                                                                                                    | 0.0938                                                            | 0.1074                                                                   |
| Goodness-of-fit on F <sup>2</sup>           | 1.052                                                                     | 1.086                                                                                                                | 1.055                                                              | 1.056                                                                                                       | 1.019                                                                                                                                                                                                                                                                     | 1.035                                                             | 1.106                                                                    |



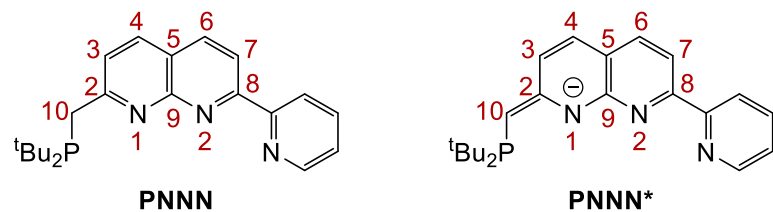

Figure S57. Atom numbering scheme used in Table S2.

Table S2. Comparison of PNNN vs PNNN\* bond lengths from X-ray crystallographic analyses.

| Bond              | Bond length (Å) |          |                                                  |                    |
|-------------------|-----------------|----------|--------------------------------------------------|--------------------|
|                   | [1]             | [5]      | [4] <sub>2</sub> [PF <sub>6</sub> ] <sub>2</sub> | [6]PF <sub>6</sub> |
| Ligand assignment | PNNN            | PNNN*    | PNNN                                             | PNNN*              |
| <b>C2–C10</b>     | 1.509(4)        | 1.376(3) | 1.497(6)                                         | 1.360(4)           |
| <b>C2–C3</b>      | 1.424(5)        | 1.449(3) | 1.427(6)                                         | 1.458(4)           |
| <b>C3–C4</b>      | 1.362(5)        | 1.338(3) | 1.354(7)                                         | 1.334(5)           |
| <b>C4–C5</b>      | 1.415(5)        | 1.436(3) | 1.417(7)                                         | 1.435(5)           |
| <b>C5–C9</b>      | 1.414(4)        | 1.429(3) | 1.422(5)                                         | 1.439(4)           |
| <b>C5–C6</b>      | 1.409(5)        | 1.387(3) | 1.405(6)                                         | 1.375(5)           |
| <b>C6–C7</b>      | 1.363(5)        | 1.379(4) | 1.368(7)                                         | 1.387(5)           |
| <b>C7–C8</b>      | 1.415(4)        | 1.381(3) | 1.400(6)                                         | 1.388(4)           |
| <b>C2–N1</b>      | 1.323(4)        | 1.388(3) | 1.325(6)                                         | 1.402(4)           |
| <b>C9–N1</b>      | 1.349(4)        | 1.356(3) | 1.346(5)                                         | 1.333(4)           |
| <b>C8–N2</b>      | 1.334(4)        | 1.346(3) | 1.342(5)                                         | 1.360(4)           |
| <b>C9–N2</b>      | 1.349(4)        | 1.357(3) | 1.379(5)                                         | 1.371(4)           |
